# Supplementary material for: An efficient and rapid intramolecular cyclization of a quadruple Mannich reaction for one-pot synthesis of pentaazaphenalenes and their antimicrobial activities
Source: Royal Society of Chemistry journal article supplement (doi:10.1039/c6ra20689a), 2016-01-01
Supplement: c6ra20689a1.pdf [file c6ra20689a1.pdf]

## Electronic Supplementary Information

# **An efficient and rapid intramolecular cyclization of quadruple Mannich reaction for the one-pot synthesis of pentaazaphenalenenes and their antimicrobial activities**

*Ahmed F. M. EL-Mahdy,<sup>\*a</sup> and Hassan A. H. El-Sherif<sup>a</sup>*

**Chemistry Department, Faculty of Science, Assuit University, Assuit 71516, Egypt.**

**E-mail: [ahmed.ahmed20@science.au.edu.eg](mailto:ahmed.ahmed20@science.au.edu.eg)**

## Table of contents

1. The geometry structure of intermediate tautomer and atomic charge of intermediate tautomer **6a**...S2
2. IR, <sup>1</sup>H-NMR and <sup>13</sup>C-NMR of compounds 3a-k.....S3-S33

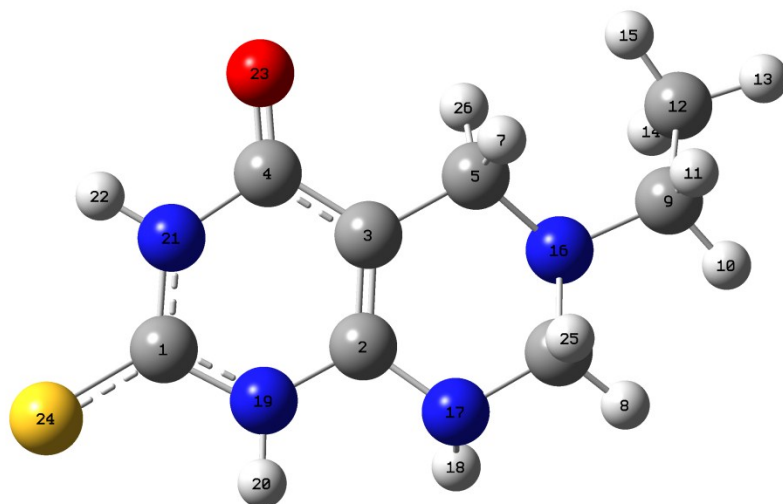

**Figure S1.** The geometry structure of intermediate tautomer **6a**. Atom color code: Carbon (gray), nitrogen (blue), oxygen (red), sulfur (yellow), bromine (orange) and hydrogen (white).

**Table S1.** Values of atomic charge of intermediate tautomer **6a**.

| Atom | Number | Charge    |
|------|--------|-----------|
| C    | 1      | 0.24198   |
| C    | 2      | 0.42319   |
| C    | 3      | - 0.23840 |
| C    | 4      | 0.65682   |
| C    | 5      | - 0.26874 |
| C    | 6      | - 0.08130 |
| H    | 7      | 0.22825   |
| H    | 8      | 0.25065   |
| C    | 9      | - 0.27104 |
| H    | 10     | 0.23901   |
| H    | 11     | 0.21085   |
| C    | 12     | - 0.70967 |
| H    | 13     | 0.24841   |
| H    | 14     | 0.24718   |
| H    | 15     | 0.24192   |
| N    | 16     | - 0.55760 |
| N    | 17     | - 0.67056 |
| H    | 18     | 0.42809   |
| N    | 19     | - 0.61320 |
| H    | 20     | 0.46452   |
| N    | 21     | - 0.64060 |
| H    | 22     | 0.47049   |
| O    | 23     | - 0.61361 |
| S    | 24     | - 0.18107 |
| H    | 25     | 0.21903   |
| H    | 26     | 0.27539   |

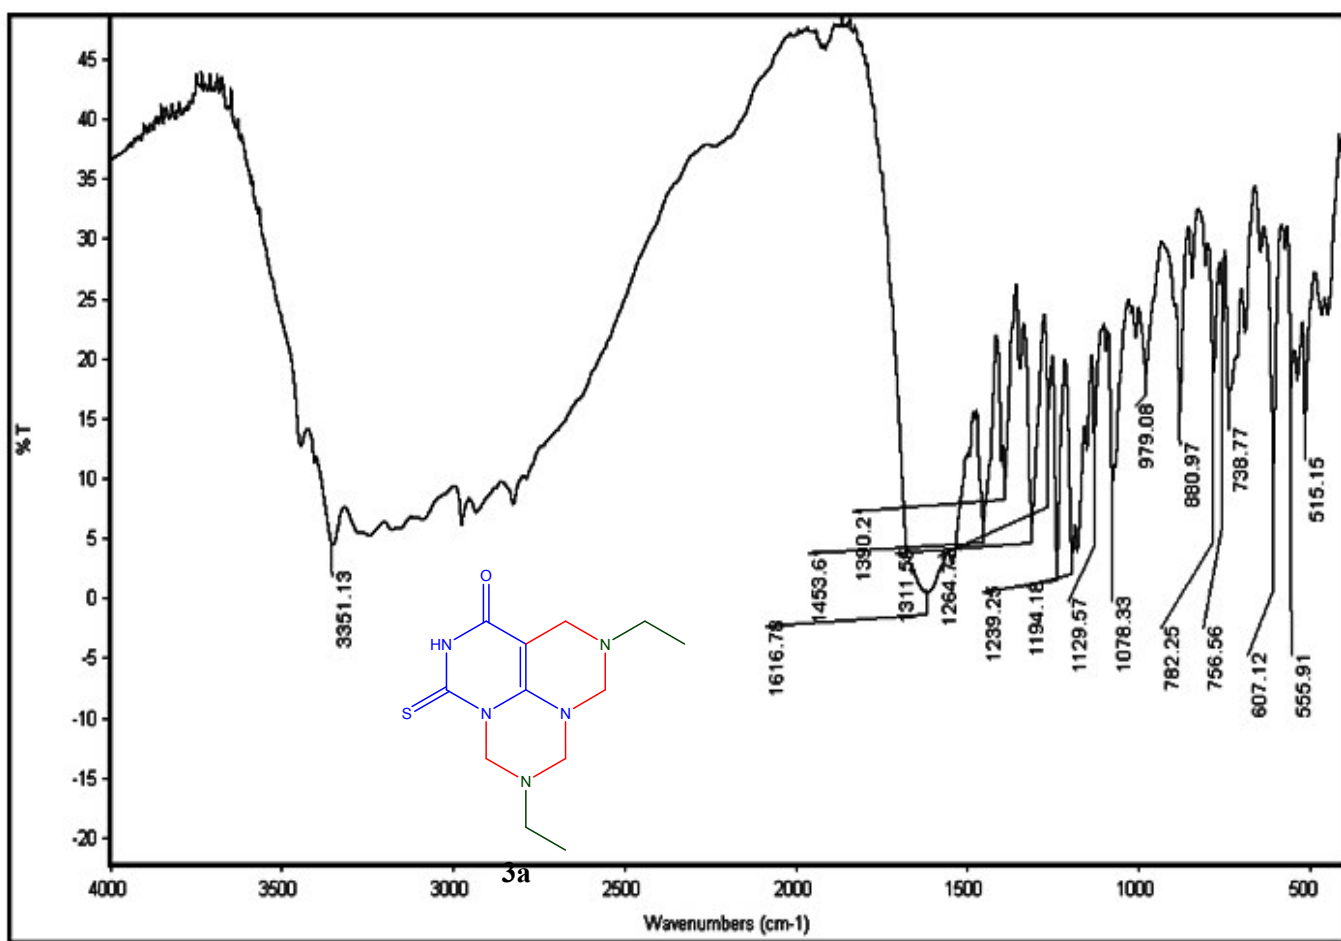

FTIR spectrum of compound 3a.

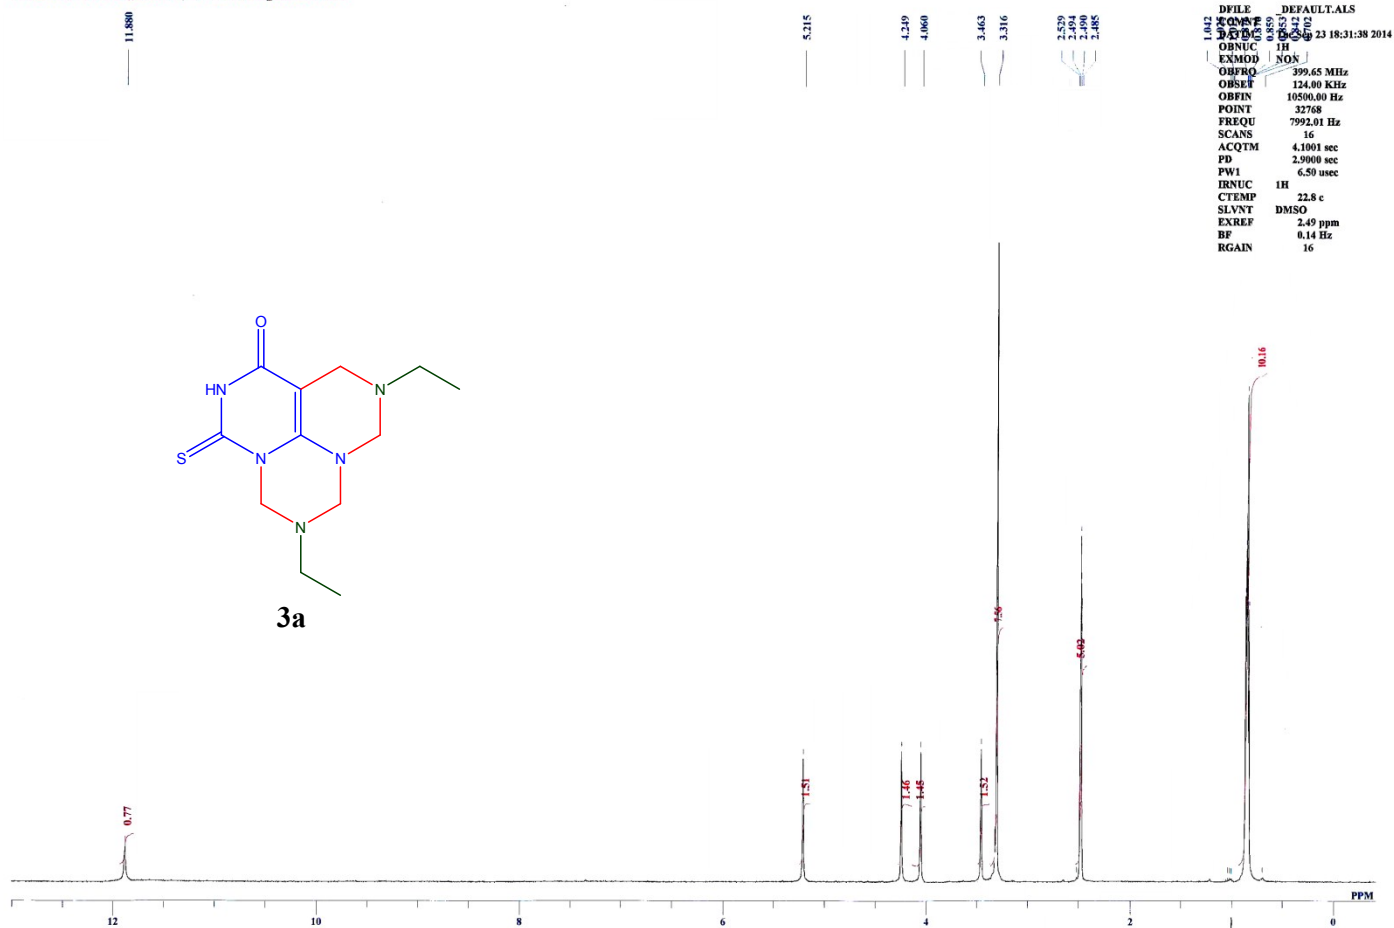

<sup>1</sup>H-NMR spectrum of compound **3a** (400 MHz, DMSO-*d*<sub>6</sub>).

NAME ae100  
 EXPNO 2  
 PROCNO 1  
 Date\_ 20110323  
 Time 16.04  
 INSTRUM spect  
 PROBHD 5 mm PABBO BB/  
 PULPROG zgdc30  
 TD 48074  
 SOLVENT DMSO  
 NS 1024  
 DS 4  
 SWH 24038.461 Hz  
 FIDRES 0.500030 Hz  
 AQ 0.9999892 sec  
 RG 57  
 DW 20.800 usec  
 DE 6.00 usec  
 TE 296.4 K  
 D1 0.00100000 sec  
 D11 0.03000000 sec  
 TDO 1

===== CHANNEL f1 =====  
 NUC1 13C  
 P1 8.50 usec  
 PL1 -3.00 dB  
 PL1W 58.63890457 W  
 SFO1 100.6228298 MHz

===== CHANNEL f2 =====  
 CPDPRG2 waltz16  
 NUC2 1H  
 PCPD2 80.00 usec  
 PL2 -4.00 dB  
 PL12 14.06 dB  
 PL2W 21.45254898 W  
 PL12W 0.33533499 W  
 SFO2 400.1316005 MHz  
 SI 32768  
 SF 100.6127690 MHz

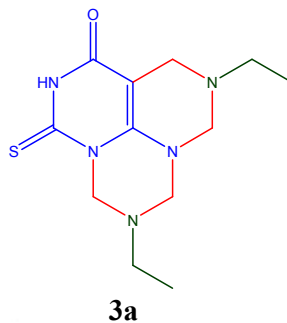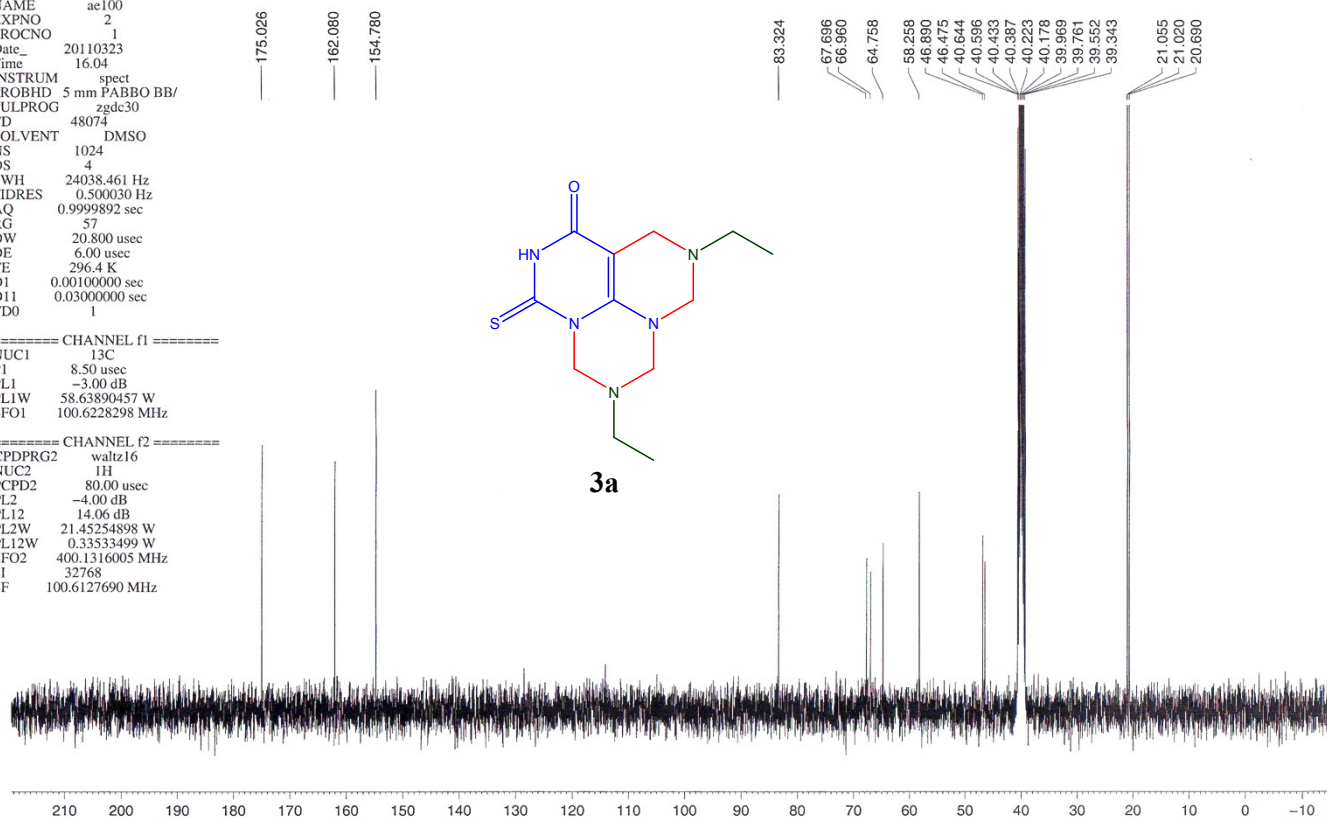

$^{13}\text{C}$ -NMR spectrum of compound **3a** (400 MHz,  $\text{DMSO-}d_6$ ).

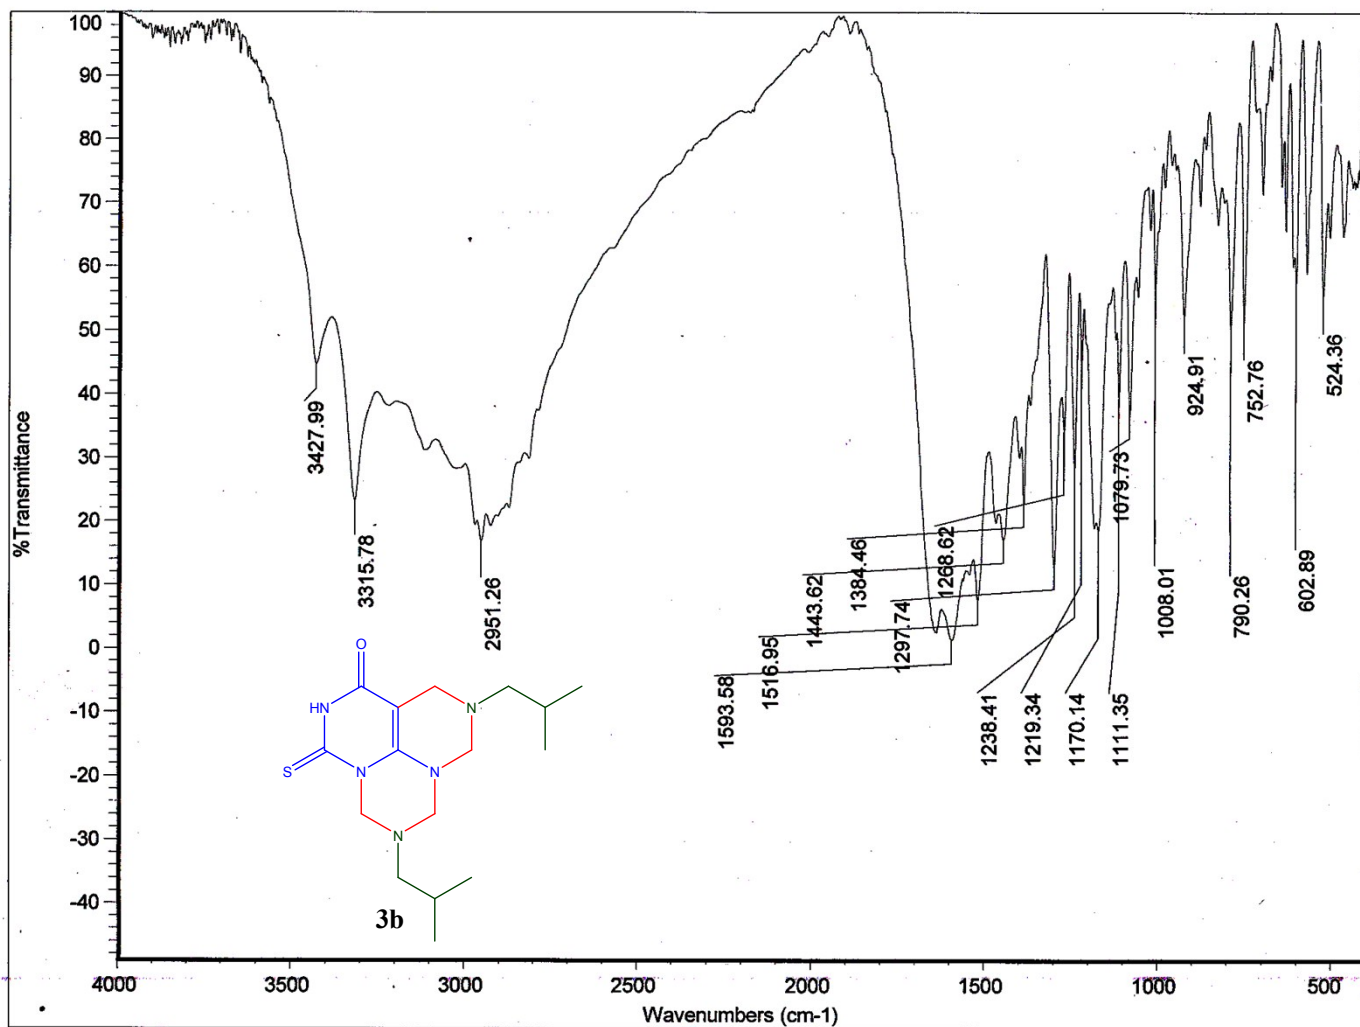

FTIR spectrum of compound **3b**

```

NAME a1
EXPNO 1
PROCNO 1
Date_ 20110323
Time 15.45
INSTRUM spect
PROBHD 5 mm PABBO BB/
PULPROG zg30
TD 57690
SOLVENT DMSO
NS 16
DS 2
SWH 7211.539 Hz
FIDRES 0.125005 Hz
AQ 3.9998901 sec
RG 161
DW 69.333 usec
DE 6.00 usec
TE 295.1 K
D1 0.00100000 sec
TDO 1

===== CHANNEL f1 =====
NUC1 1H
P1 10.00 usec
PL1 -4.00 dB
PL1W 21.45254898 W
SFO1 400.1334011 MHz
SI 131072
SF 400.1300000 MHz
WDW EM
SSB 0
LB 0.30 Hz
GB 0
PC 4.00

```

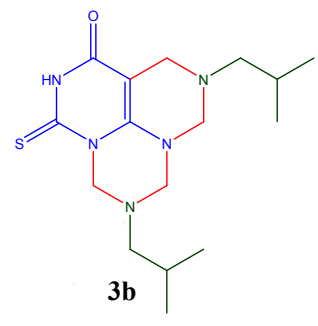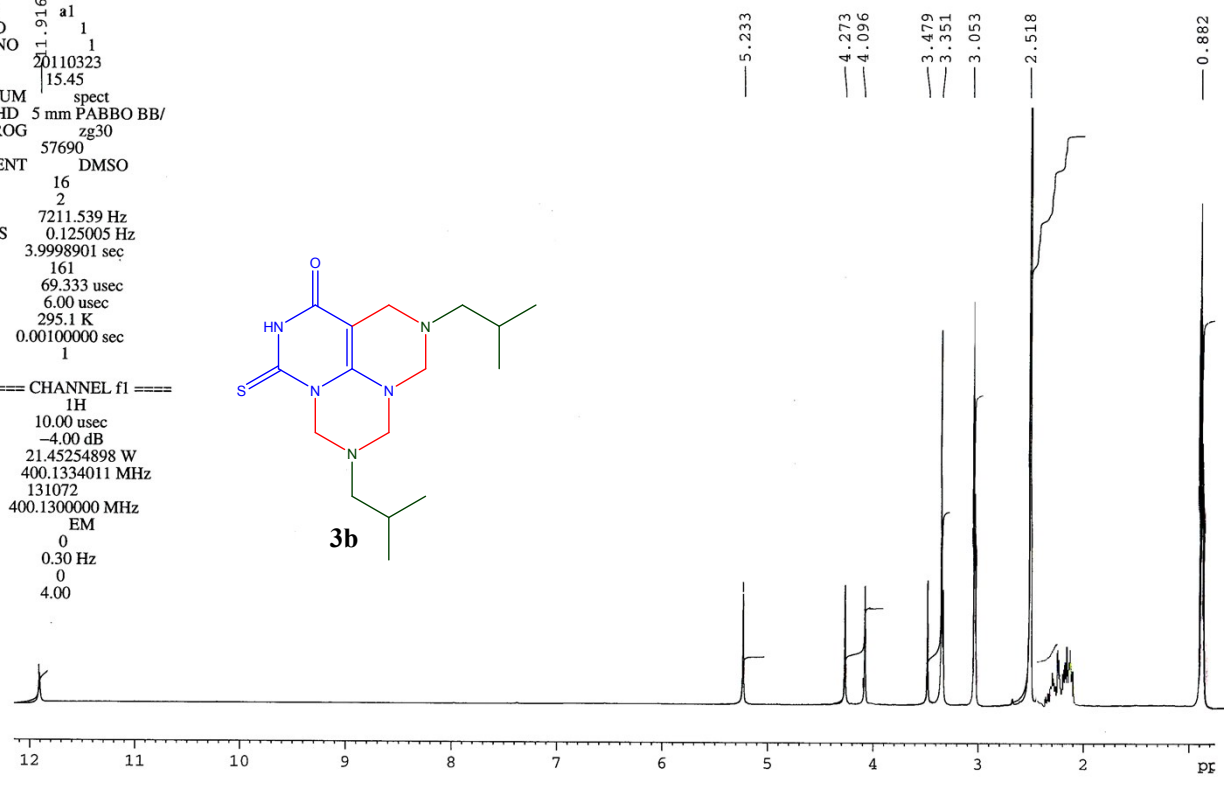

H-NMR spectrum of compound **3b** (400 MHz, DMSO-*d*<sub>6</sub>).



NAME a1  
 EXPNO 2  
 PROCNO 1  
 Date 20110323  
 Time 16.04  
 INSTRUM spect  
 PROBHD 5 mm PABBO BB/  
 PULPROG zgdc30  
 TD 48074  
 SOLVENT DMSO  
 NS 1024  
 DS 4  
 SWH 24038.461 Hz  
 FIDRES 0.500030 Hz  
 AQ 0.9999892 sec  
 RG 57  
 DW 20.800 usec  
 DE 6.00 usec  
 TE 296.4 K  
 D1 0.00100000 sec  
 D11 0.03000000 sec  
 TD0 1

===== CHANNEL f1 =====  
 NUC1 13C  
 P1 8.50 usec  
 PL1 -3.00 dB  
 PL1W 58.63890457 W  
 SFO1 100.6228298 MHz

===== CHANNEL f2 =====  
 CPDPRG2 waltz16  
 NUC2 1H  
 PCPD2 80.00 usec  
 PL2 -4.00 dB  
 PL12 14.06 dB  
 PL2W 21.45254898 W  
 PL12W 0.33533499 W  
 SFO2 400.1316005 MHz  
 SI 32768  
 SF 100.6127690 MHz

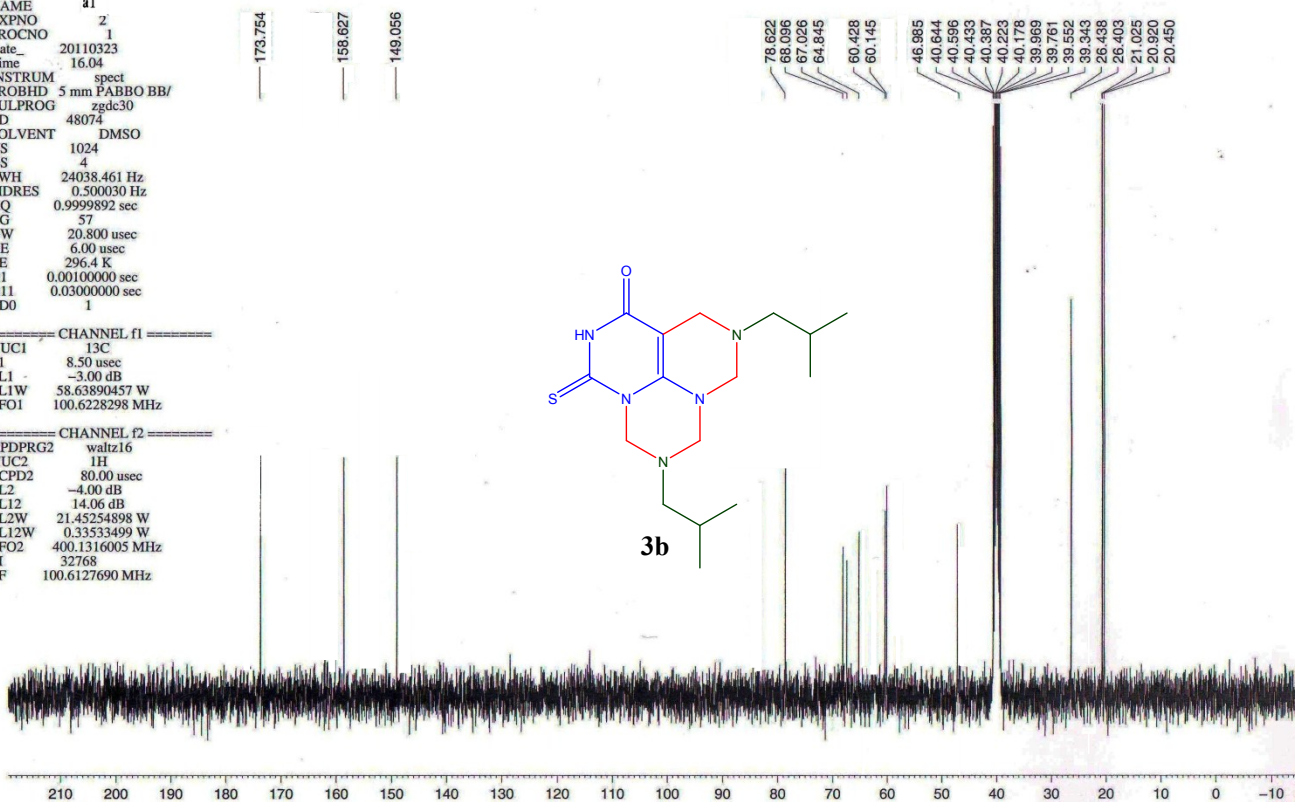

<sup>13</sup>C-NMR spectrum of compound **3b** (400 MHz, DMSO-*d*<sub>6</sub>).

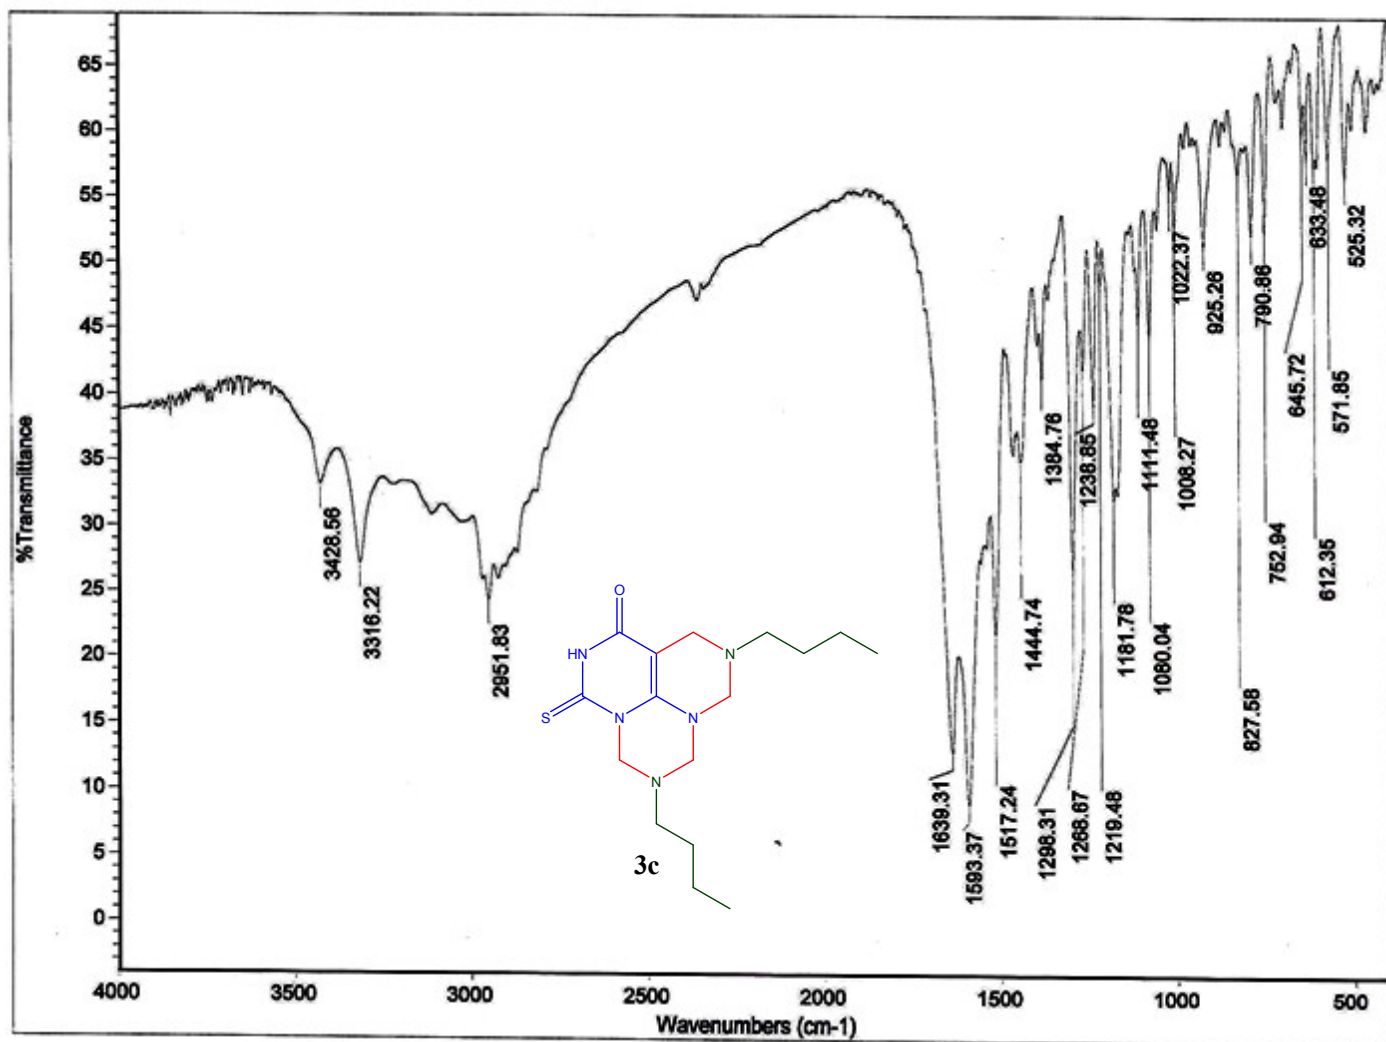

FTIR spectrum of compound 3c

NAME 11.853 2  
 EXPNO 1  
 PROCNO 1  
 Date\_ 20110323  
 Time 14.45  
 INSTRUM spect  
 PROBHD 5 mm PABBO BB/  
 PULPROG zg30  
 TD 57690  
 SOLVENT DMSO  
 NS 16  
 DS 2  
 SWH 7211.539 Hz  
 FIDRES 0.125005 Hz  
 AQ 3.9998901 sec  
 RG 161  
 DW 69.333 usec  
 DE 6.00 usec  
 TE 295.1 K  
 DI 0.00100000 sec  
 TDO 1

===== CHANNEL f1 =====  
 NUC1 1H  
 P1 10.00 usec  
 PL1 -4.00 dB  
 PL1W 21.45254898 W  
 SFO1 400.1334011 MHz  
 SI 131072  
 SF 400.1300000 MHz  
 WDW EM  
 SSB 0  
 LB 0.30 Hz  
 GB 0  
 PC 4.00

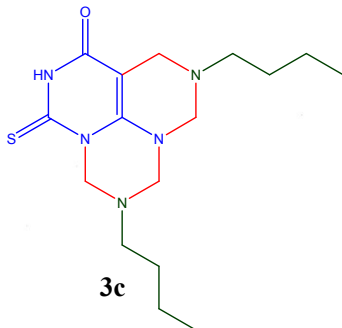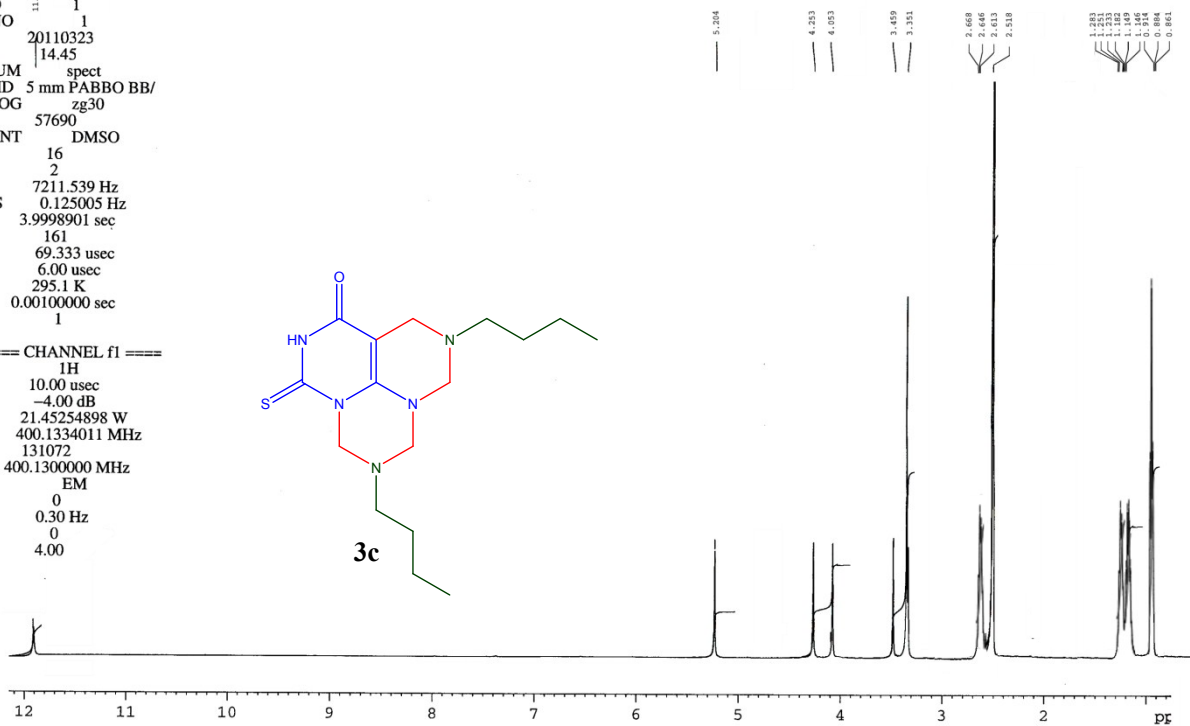

<sup>1</sup>H-NMR spectrum of compound **3c** (400 MHz, DMSO-*d*<sub>6</sub>).

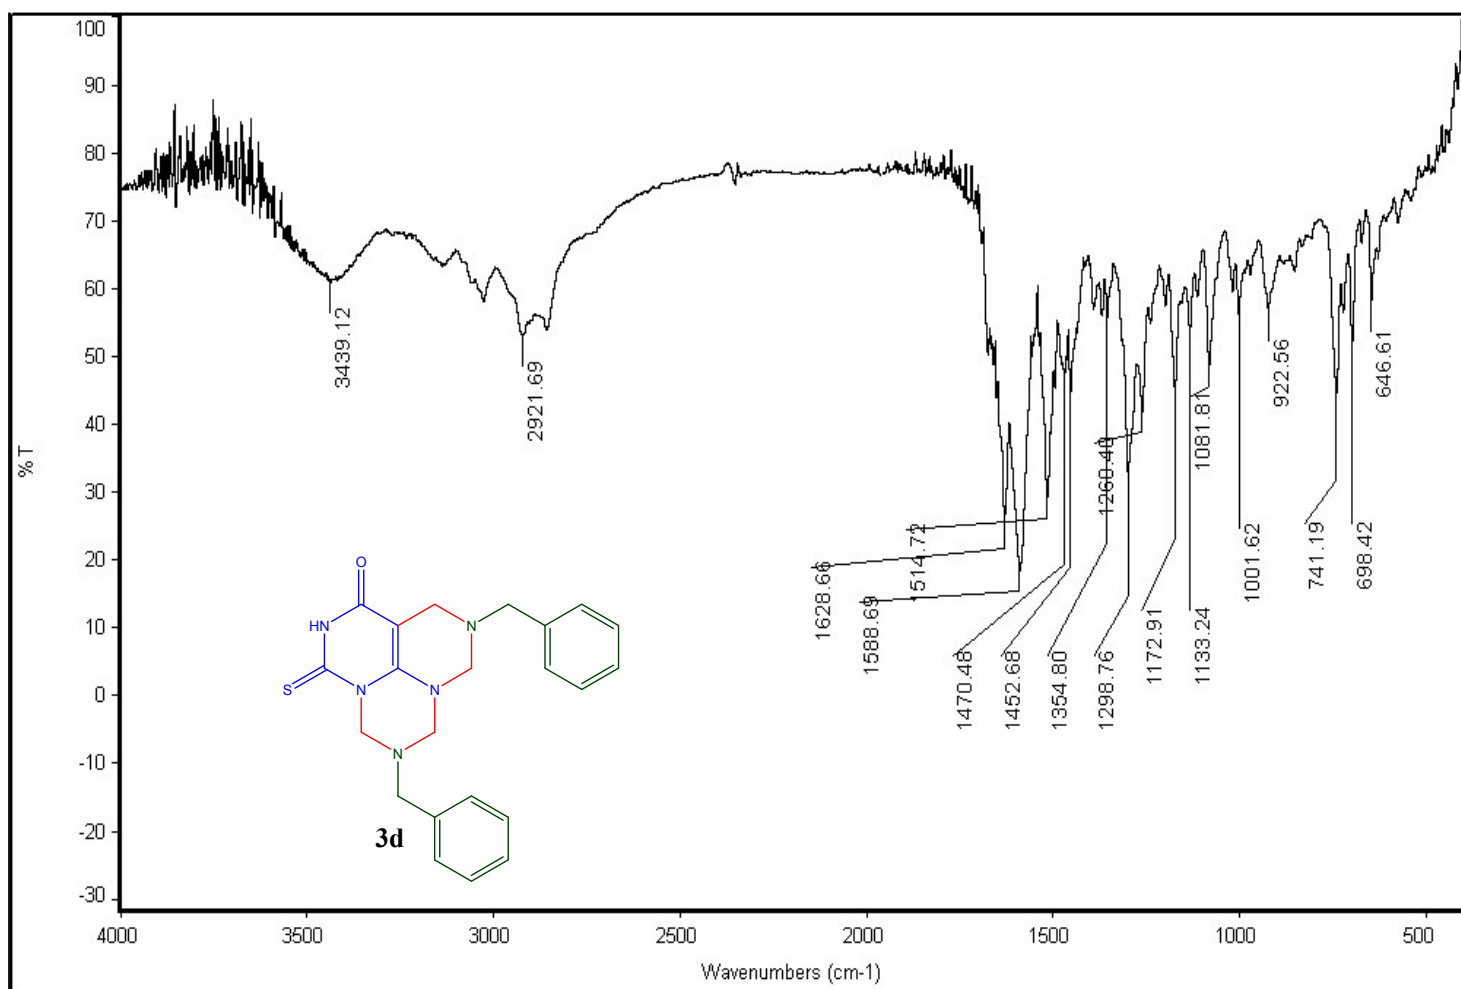

FTIR spectrum of compound **3d**.

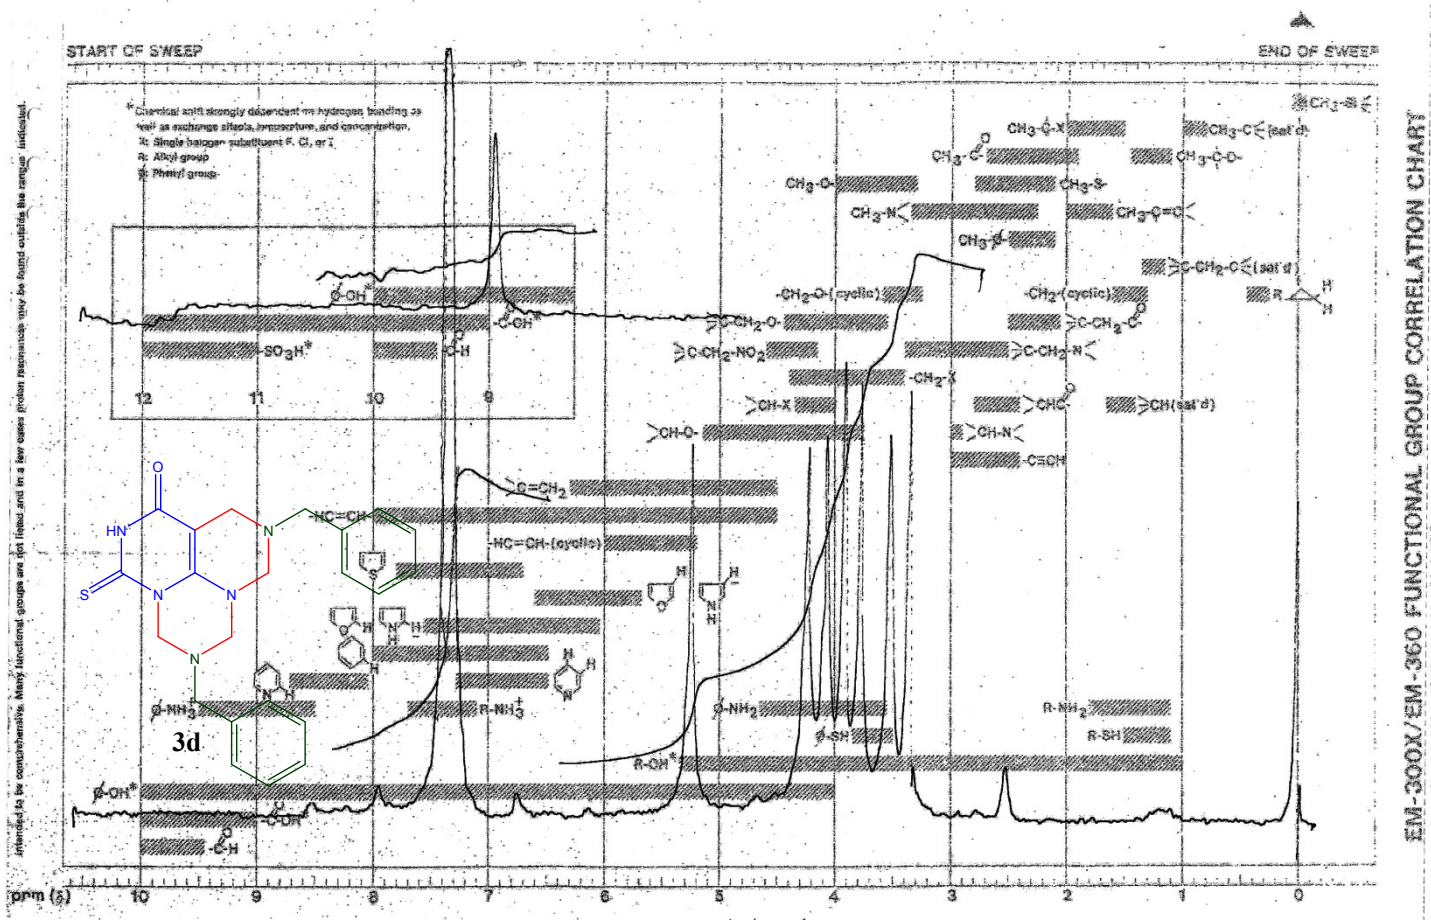

<sup>1</sup>H-NMR spectrum of compound **3d** (90 MHz, DMSO-*d*<sub>6</sub>).

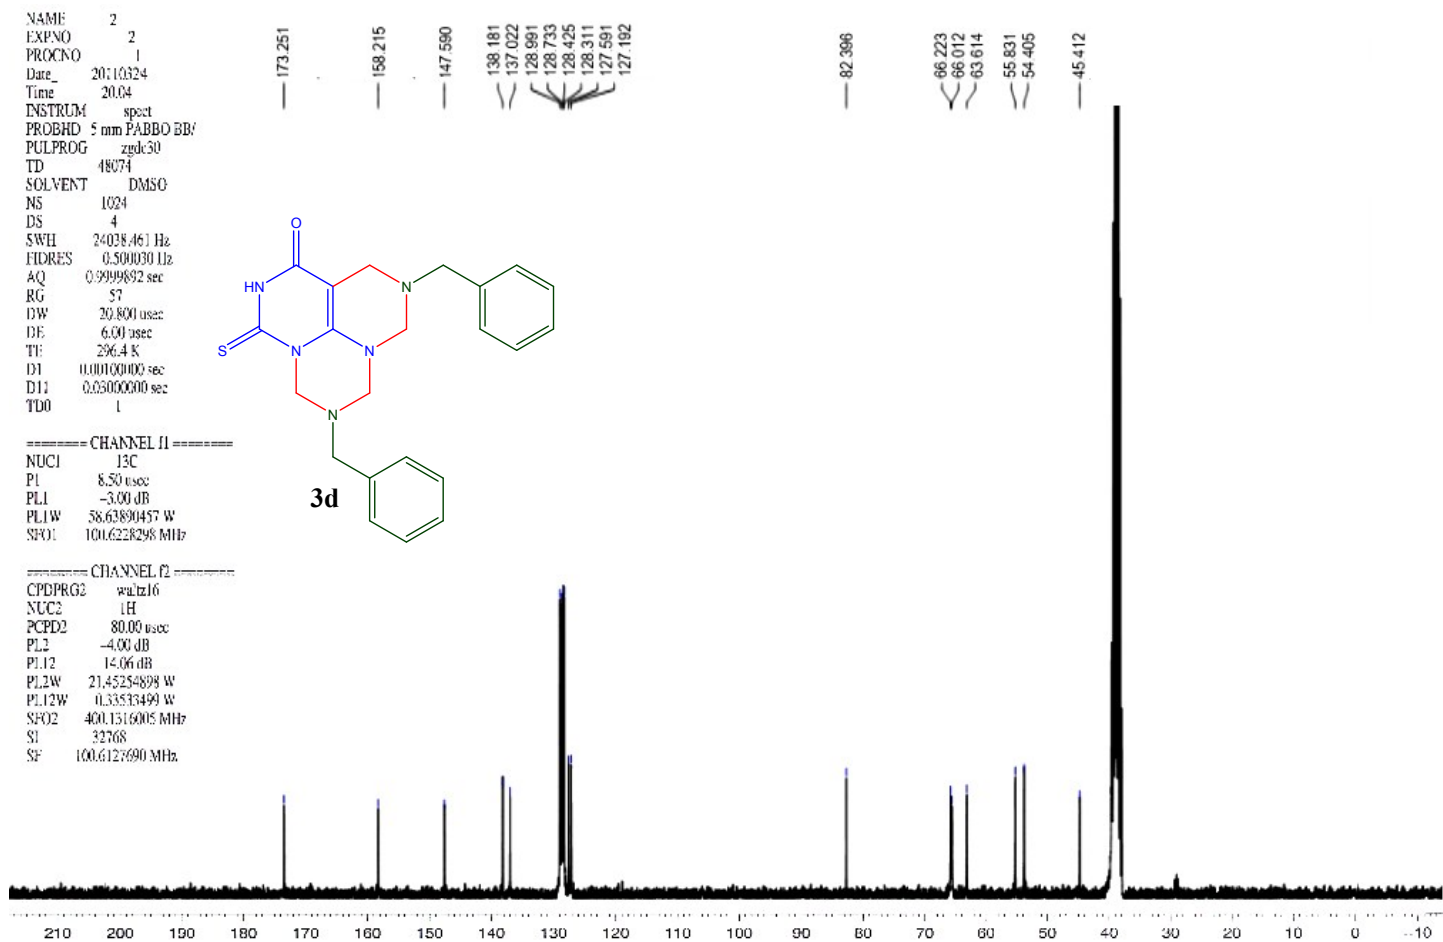

$^{13}\text{C}$ -NMR spectrum of compound **3d** (400 MHz,  $\text{DMSO-}d_6$ ).

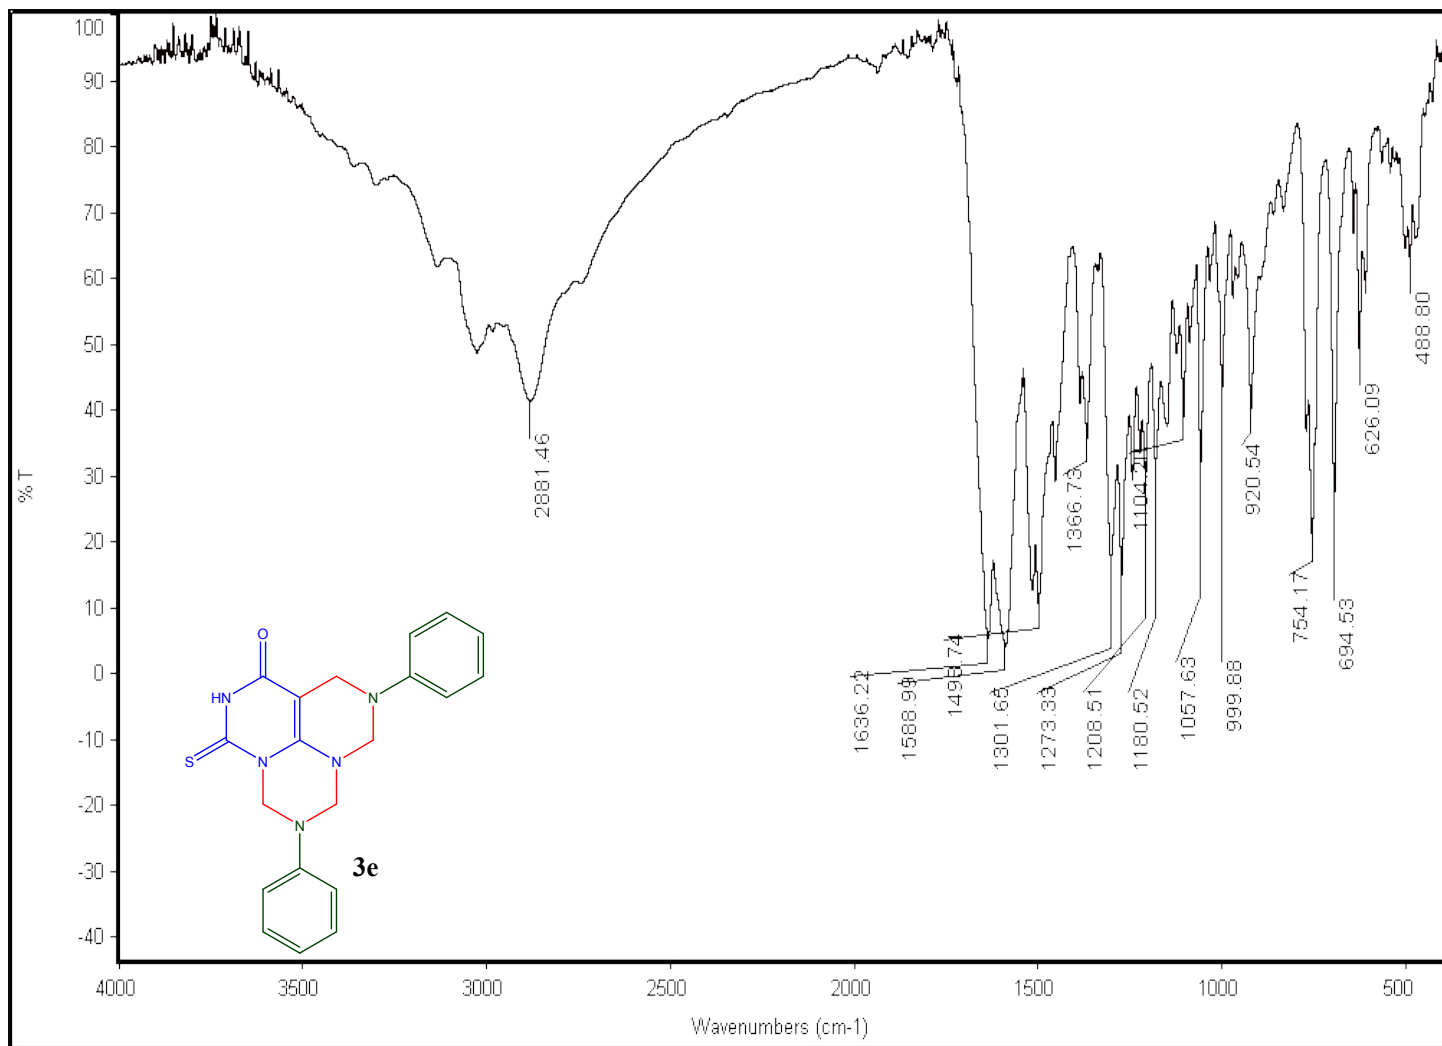

FTIR spectrum of compound 3e

NAME acXW  
 EXPNO 1  
 PROCNO 1  
 Date\_ 20110323  
 Time 16.08  
 INSTRUM spect  
 PROBHD 5 mm PABBO BB/  
 PULPROG zg30  
 TD 57690  
 SOLVENT DMSO  
 NS 16  
 DS 2  
 SWH 7211.539 Hz  
 FIDRES 0.125005 Hz  
 AQ 3.9998901 sec  
 RG 228  
 DW 69.333 usec  
 DE 6.00 usec  
 TE 295.3 K  
 D1 0.00100000 sec  
 TD0 1

CHANNEL f1 =====  
 NUC1 1H  
 P1 10.00 usec  
 PL1 -4.00 dB  
 PL1W 21.45254898 W  
 SFO1 400.1334011 MHz  
 SI 131072  
 SF 400.1300000 MHz  
 WDW EM  
 SSB 0  
 LB 0.30 Hz  
 GB 0  
 PC 4.00

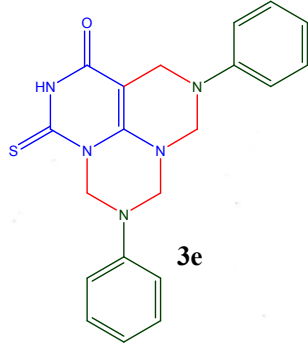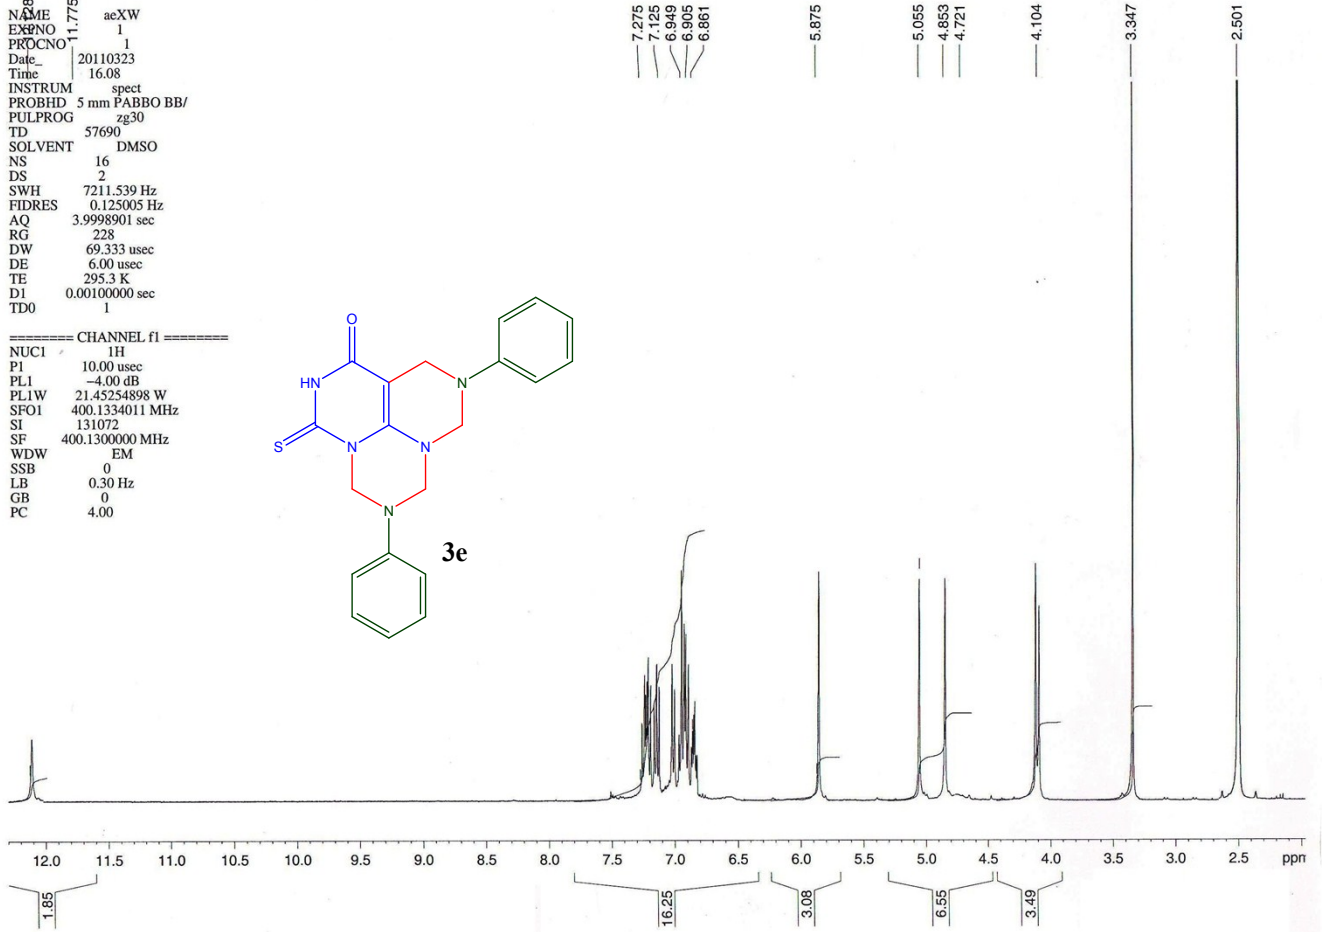

<sup>1</sup>H-NMR spectrum of compound **3e** (400 MHz, DMSO-*d*<sub>6</sub>).



NAME aeXW  
 EXPNO 2  
 PROCNO 1  
 Date\_ 20110323  
 Time 16.25  
 INSTRUM spect  
 PROBHD 5 mm PABBO BB/  
 PULPROG zgdc30  
 TD 48074  
 SOLVENT DMSO  
 NS 1024  
 DS 4  
 SWH 24038.461 Hz  
 FIDRES 0.500030 Hz  
 AQ 0.9999892 sec  
 RG 57  
 DW 20.800 usec  
 DE 6.00 usec  
 TE 296.4 K  
 D1 0.00100000 sec  
 D11 0.03000000 sec  
 TD0 1

CHANNEL f1  
 NUC1 13C  
 P1 8.50 usec  
 PL1 -3.00 dB  
 PL1W 58.63890457 W  
 SFO1 100.6228298 MHz

CHANNEL f2  
 CPDPRG2 waltz16  
 NUC2 1H  
 PCPD2 80.00 usec  
 PL2 -4.00 dB  
 PL12 14.06 dB  
 PL2W 21.45254898 W  
 PL12W 0.33533499 W  
 SFO2 400.1316005 MHz  
 SI 32768  
 SF 100.6127690 MHz

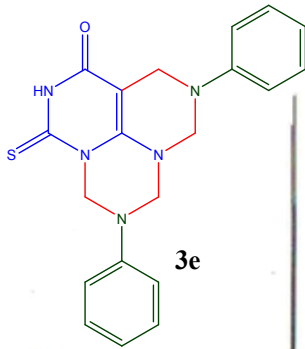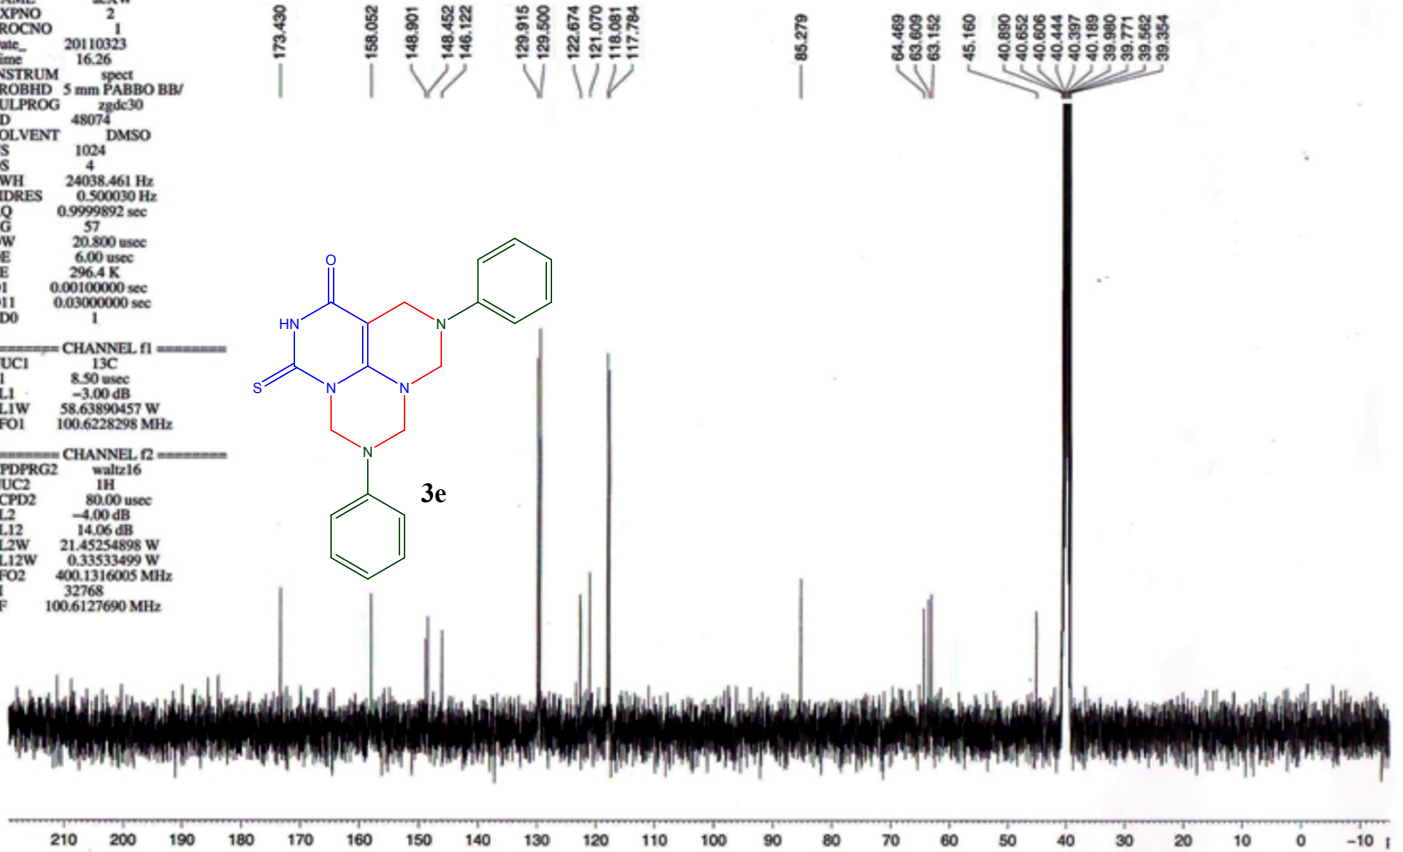

$^{13}\text{C}$ -NMR spectrum of compound **3e** (400 MHz,  $\text{DMSO-}d_6$ ).

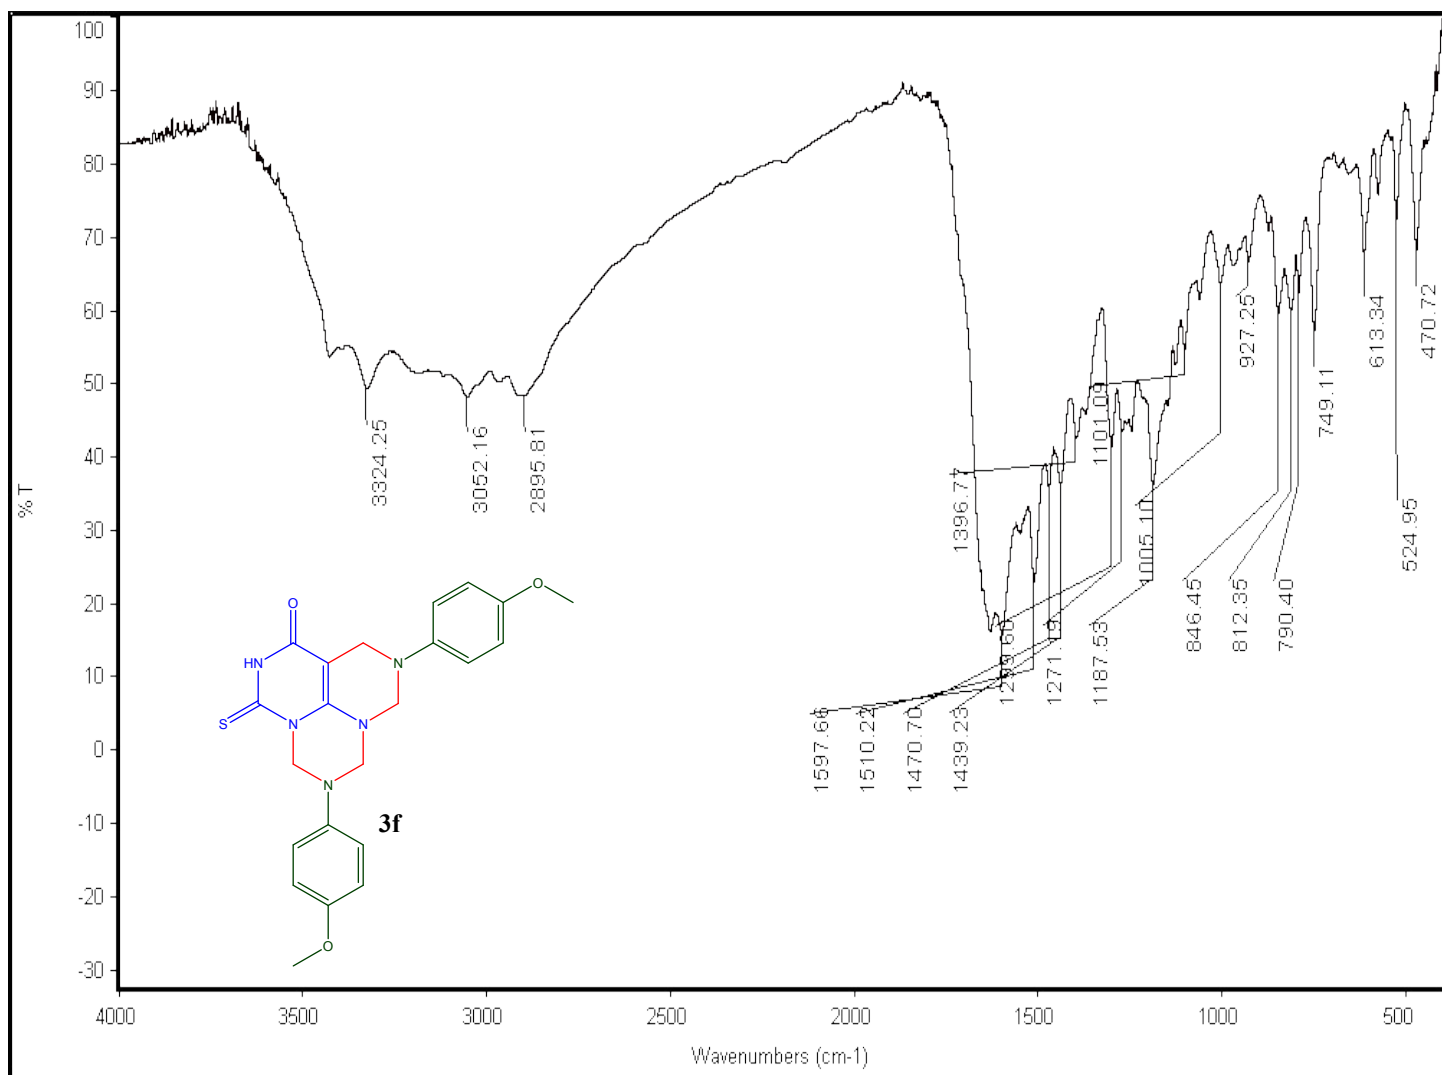

FTIR spectrum of compound **3f**

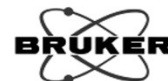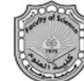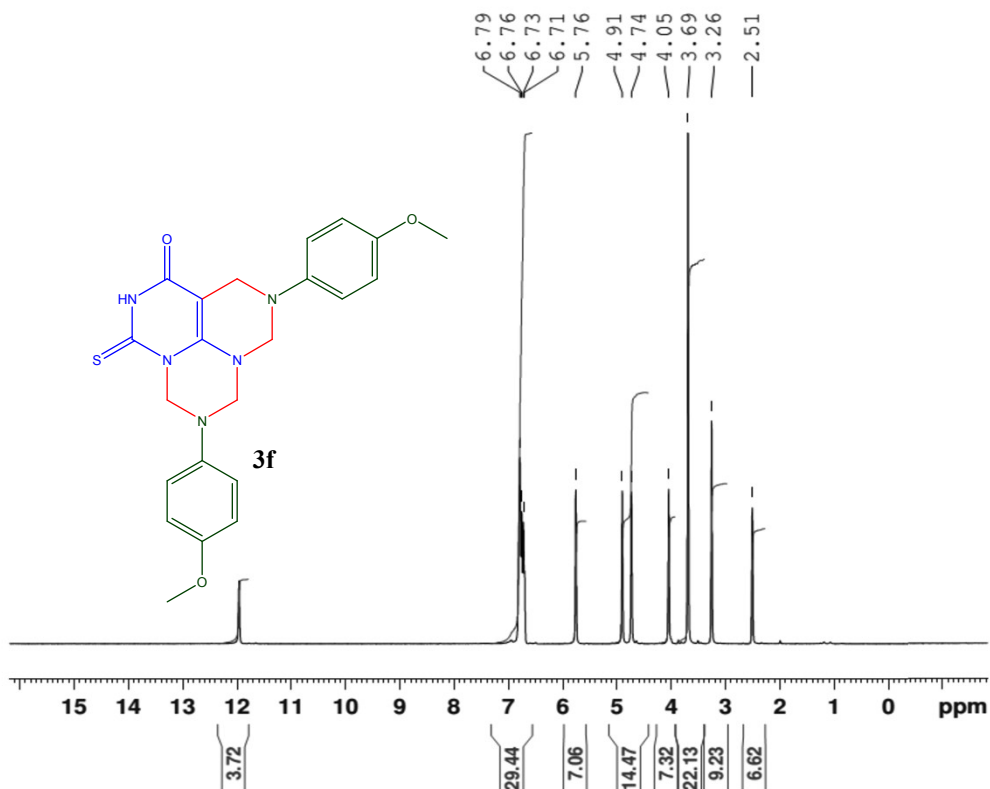

```
Current Data Parameters
NAME      Oct26-2015
EXPNO    150
PROCNO   1

F2 - Acquisition Parameters
Date_    20151026
Time     21.53
INSTRUM  spect
PROBHD   5 mm PABBO BB/
PULPROG  zg30
TD       65536
SOLVENT  DMSO
NS       20
DS       2
SWH      8012.820 Hz
FIDRES   0.122266 Hz
AQ       4.0894465 sec
RG       199.04
DW       62.400 usec
DE       6.50 usec
TE       313.2 K
D1       1.00000000 sec
TD0      1

===== CHANNEL f1 =====
SFO1     400.1324710 MHz
NUC1     1H
P1       12.00 usec
PLW1     22.00000000 W

F2 - Processing parameters
SI       65536
SF       400.1300000 MHz
WDW      EM
SSB      0
LB       0.30 Hz
GB       0
PC       1.00
```

$^1\text{H-NMR}$  spectrum of compound **3f** (400 MHz,  $\text{DMSO-}d_6$ ).

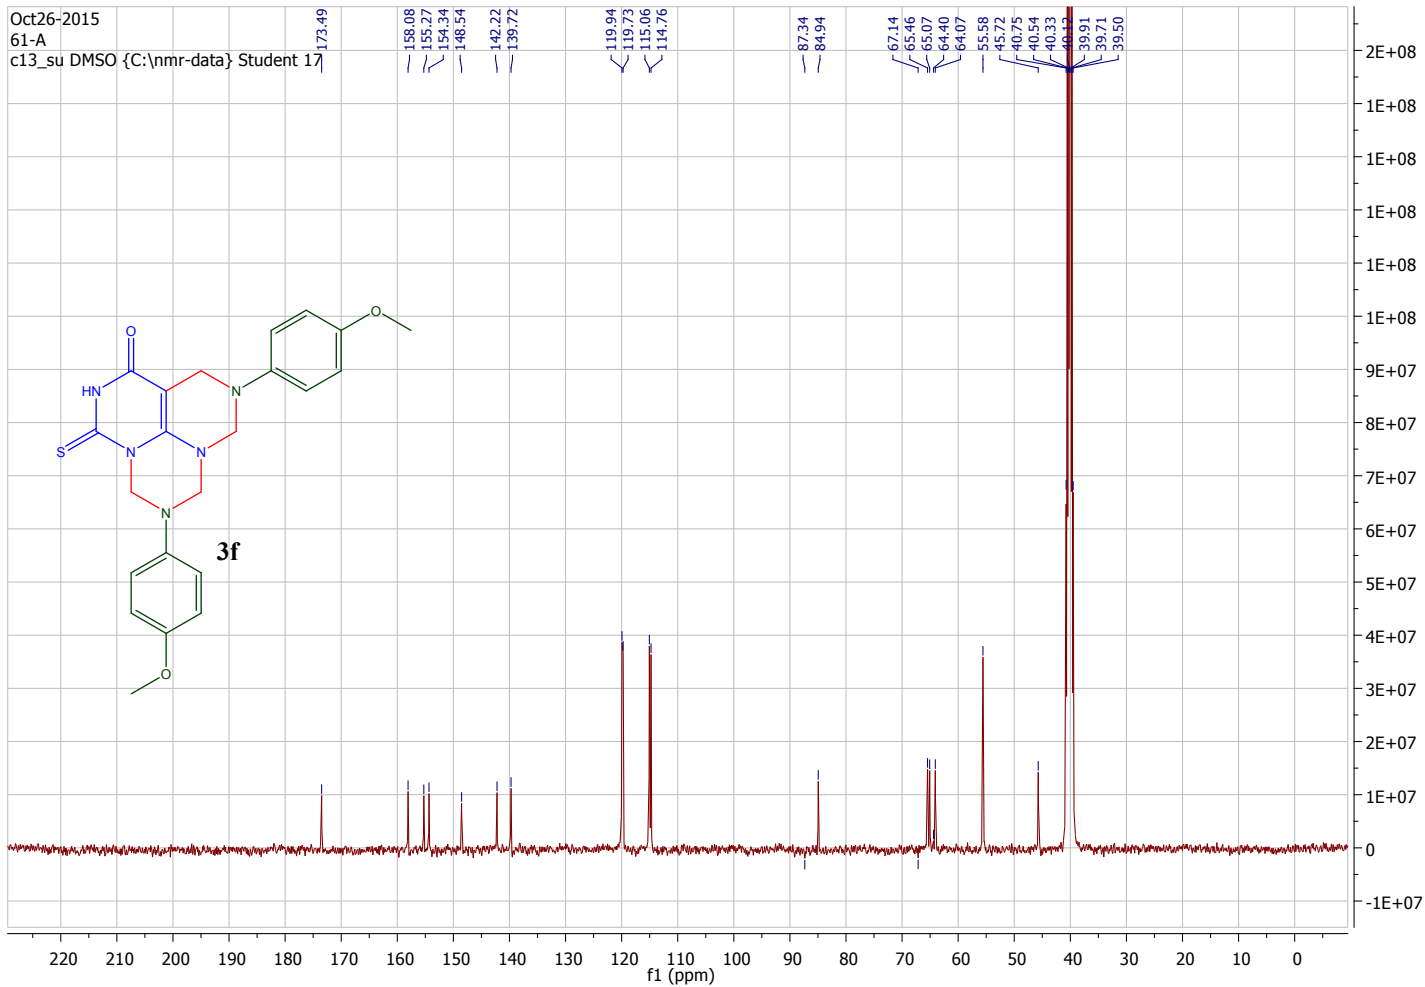

$^{13}\text{C}$ -NMR spectrum of compound **3f** (400 MHz,  $\text{DMSO}-d_6$ ).

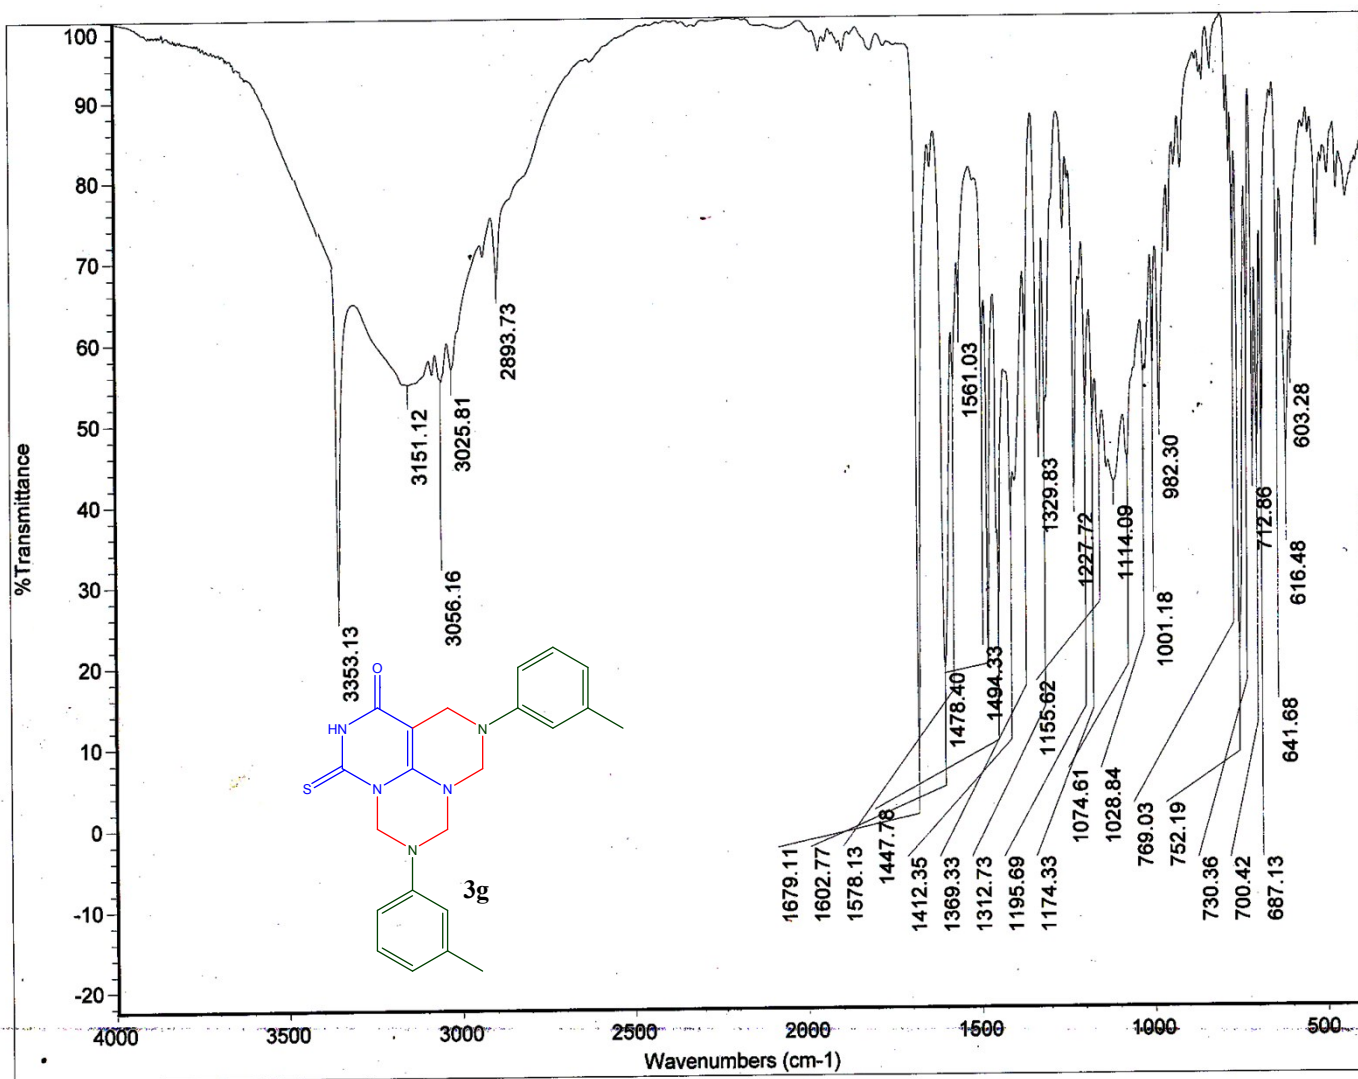

FTIR spectrum of compound **3g**

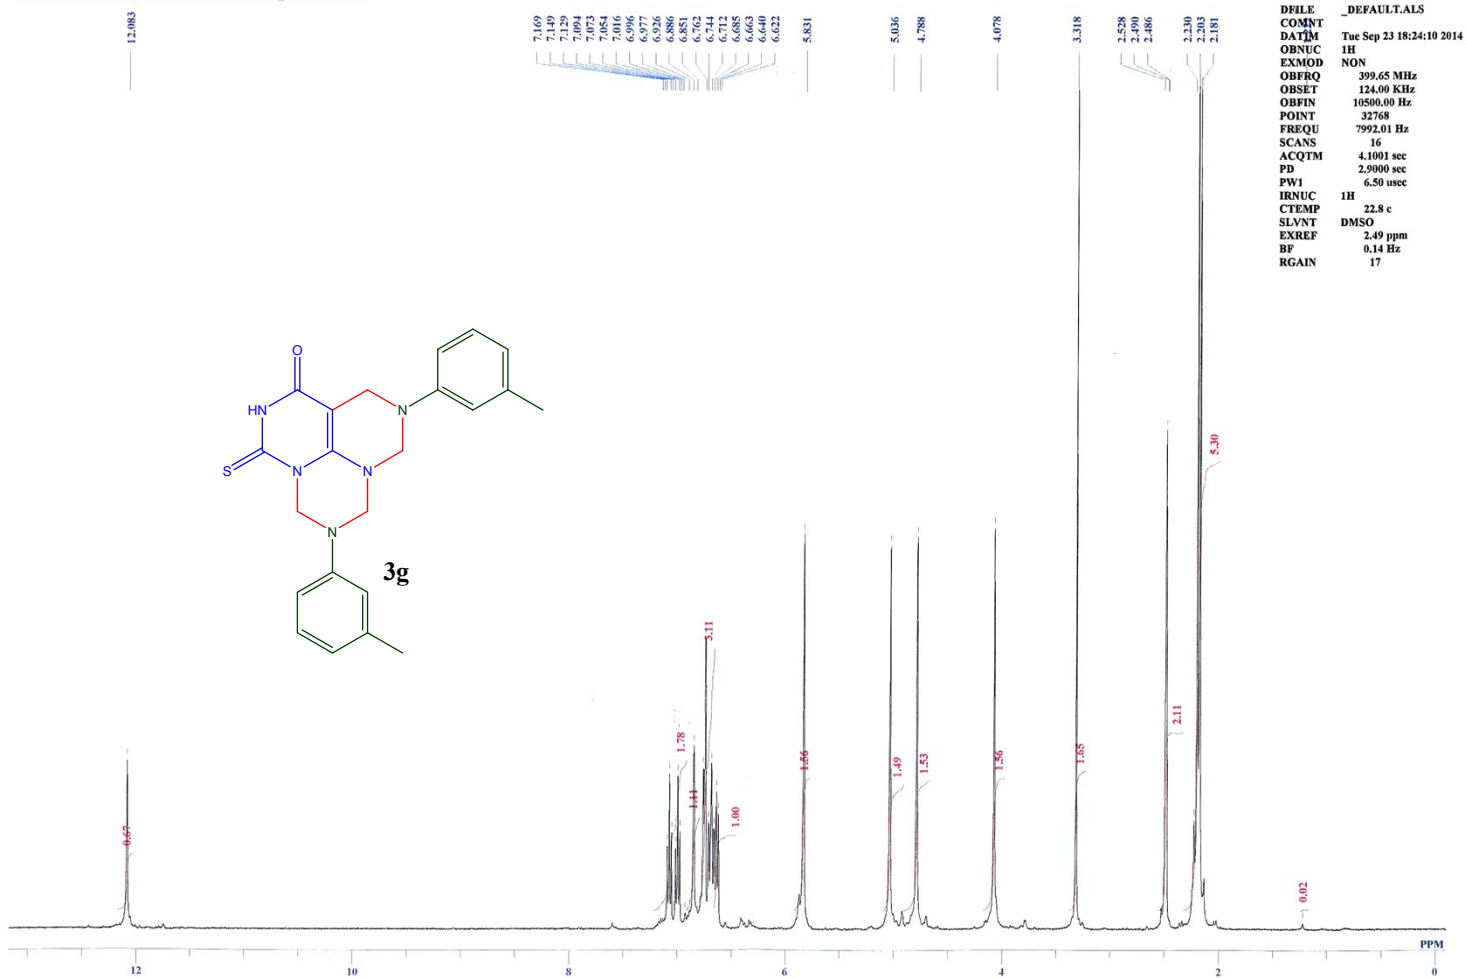

<sup>1</sup>H-NMR spectrum of compound **3g** (400 MHz, DMSO-*d*<sub>6</sub>).

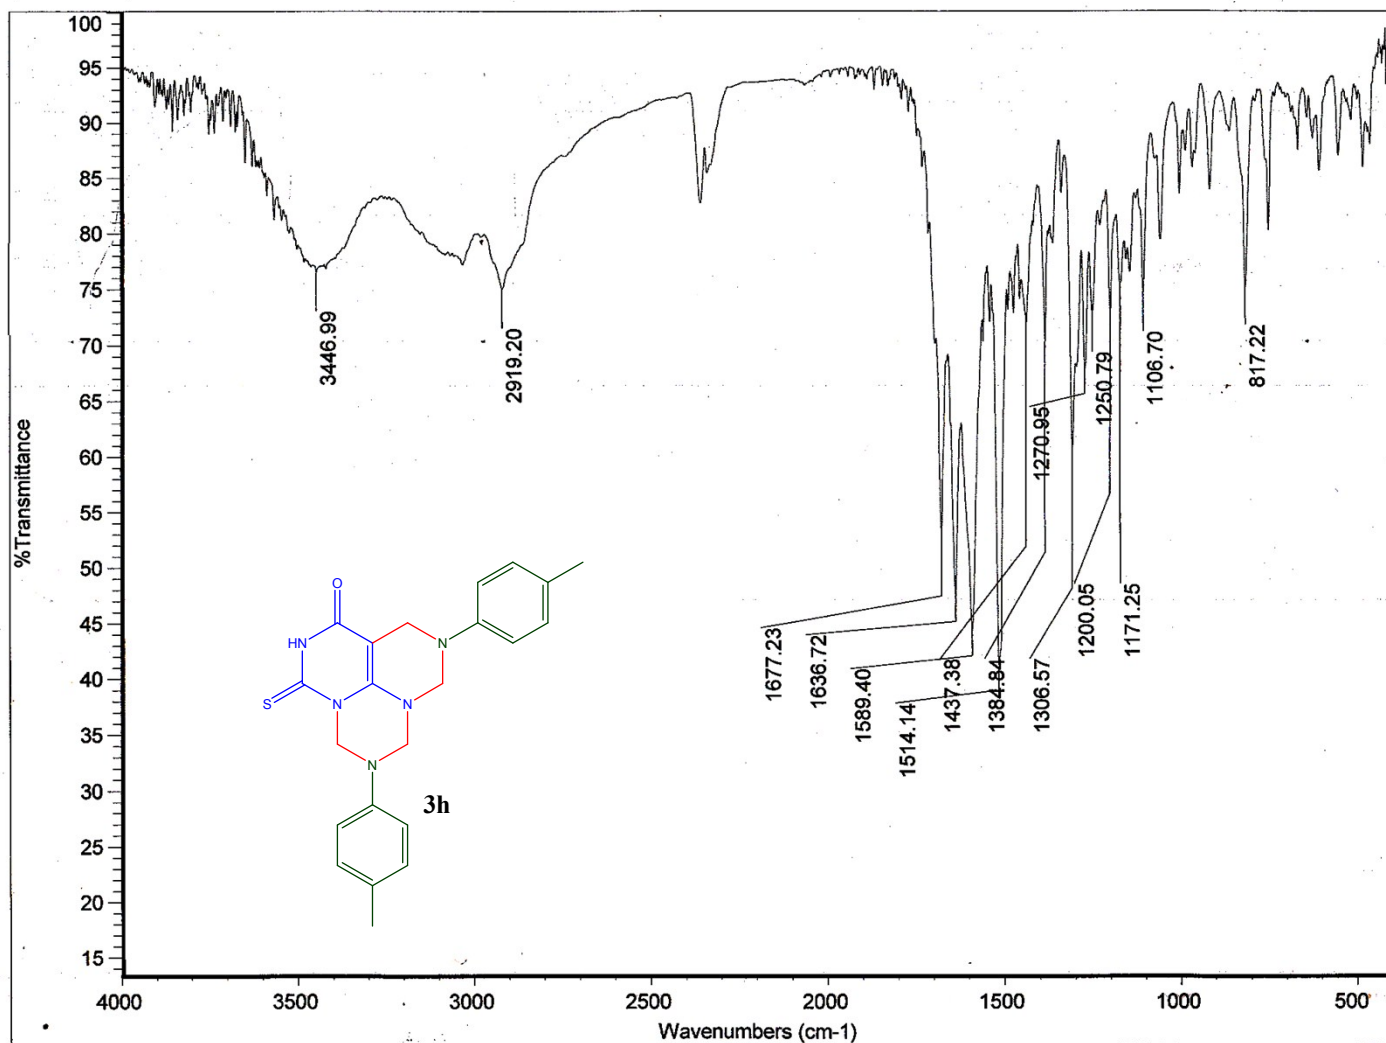

FTIR spectrum of compound **3h**

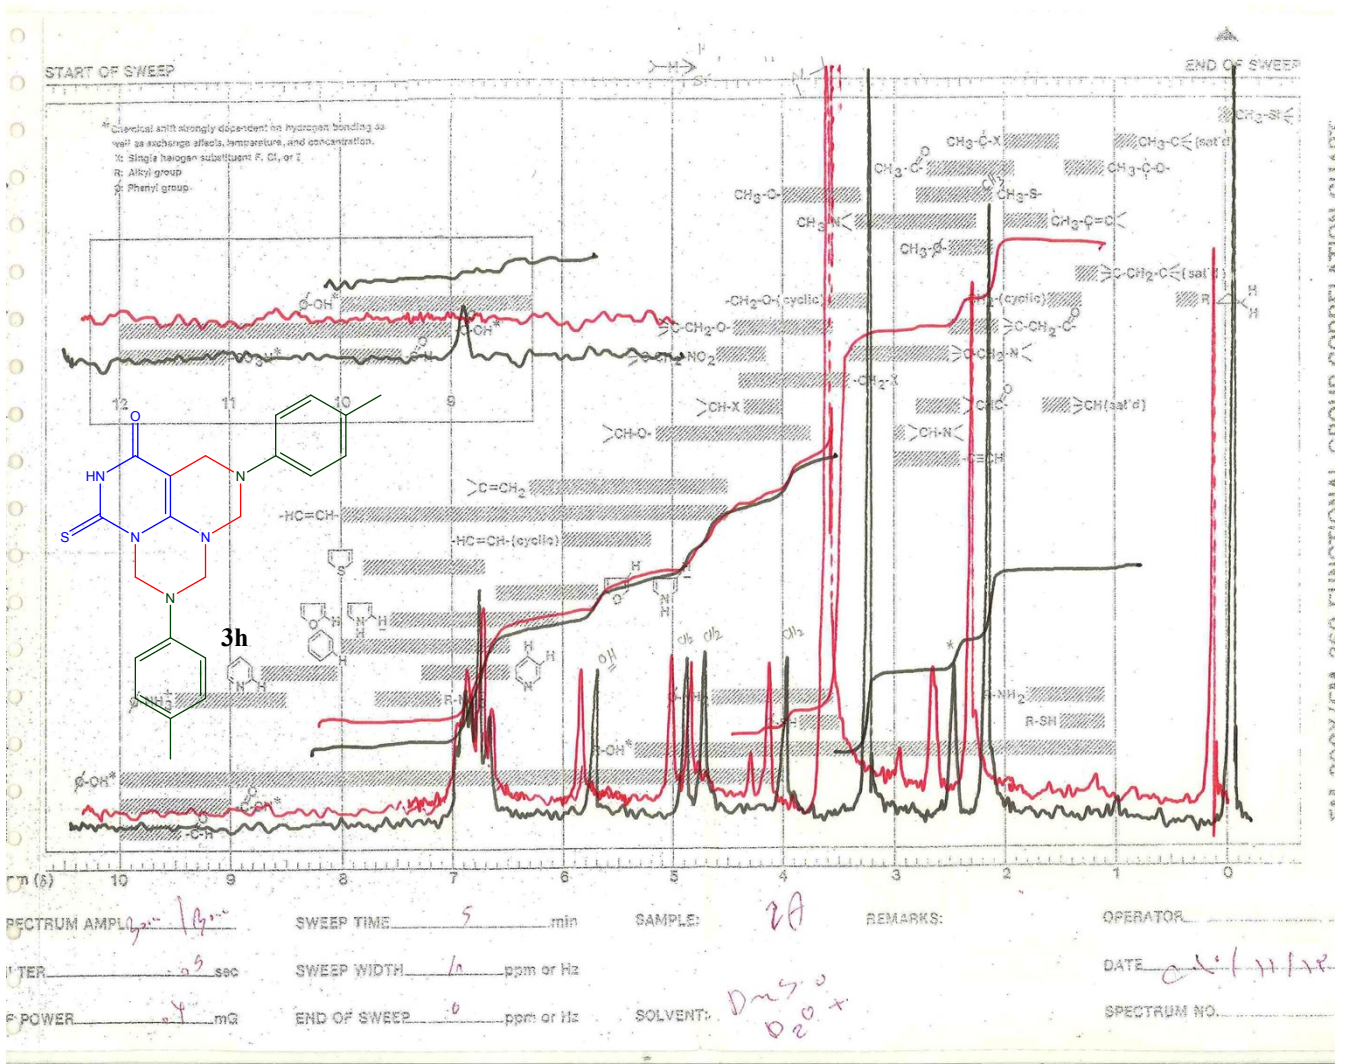

<sup>1</sup>H-NMR spectrum of compound **3h** (90 MHz, DMSO-d<sub>6</sub>).



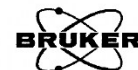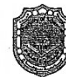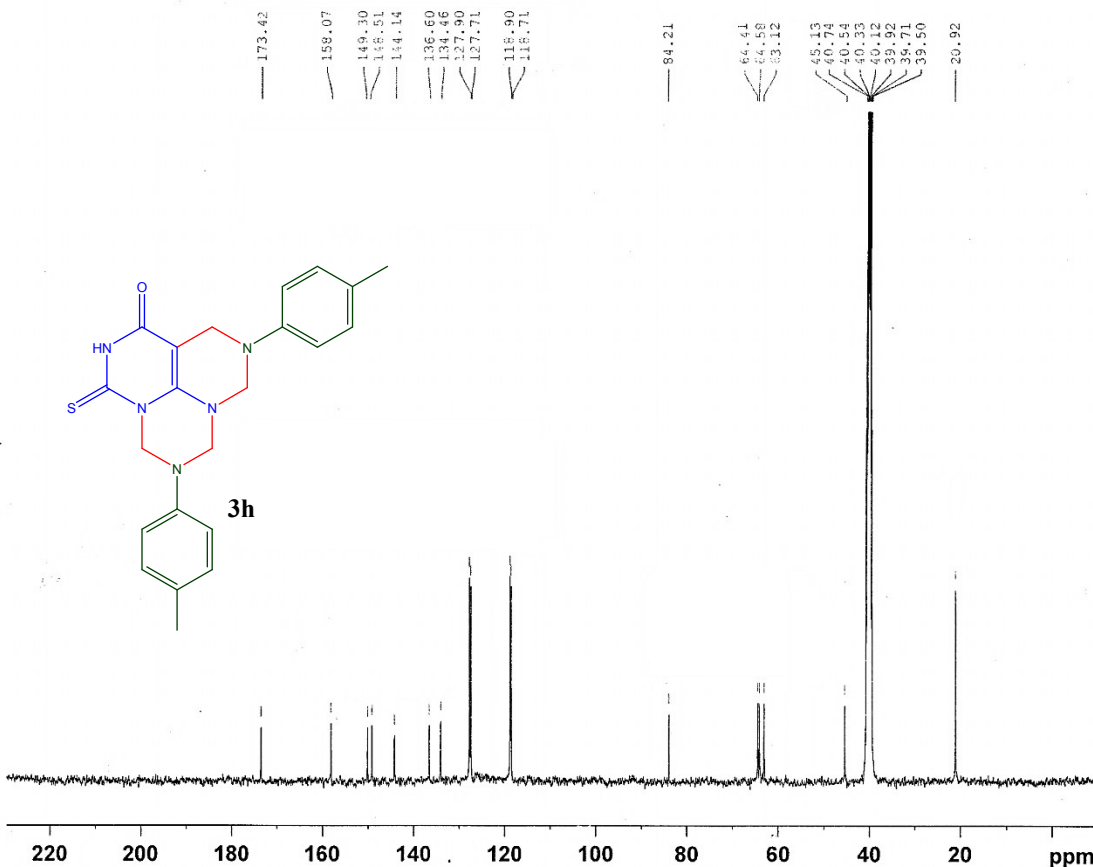

```

Current Data Parameters
NAME      Oct26-2015
EXPNO     151
PROCNO    1

F2 - Acquisition Parameters
Date_     20151025
Time      20.15
INSTRUM   spect
PROBHD    5 mm PABBO BB/
PULPROG   zgpg30
TD         65536
SOLVENT   DMSO
NS         1200
DS         4
SWH        24038.461 Hz
FIDRES     0.366798 Hz
AQ         1.3631488 sec
RG         100.43
DW         20.800 usec
DE         6.50 usec
TE         313.2 K
D1         2.0000000 sec
D11        0.0300000 sec
TD0        1

===== CHANNEL f1 =====
SFO1      100.6238364 MHz
NUC1       13C
P1         9.50 usec
PLW1       56.0000000 W

===== CHANNEL f2 =====
SFO2      400.1316005 MHz
NUC2       1H
CPDPRG[2] waltz16
PCPD2     90.00 usec
PLW2      22.0000000 W
PLW12     0.41091001 W
PLW13     0.33284000 W

F2 - Processing parameters
SI         32768
SF         100.6127690 MHz
WDW        EM
SSB        0
LB         6.00 Hz
GB         0
PC         1.40
    
```

$^{13}\text{C}$ -NMR spectrum of compound **3h** (400 MHz,  $\text{DMSO-}d_6$ ).

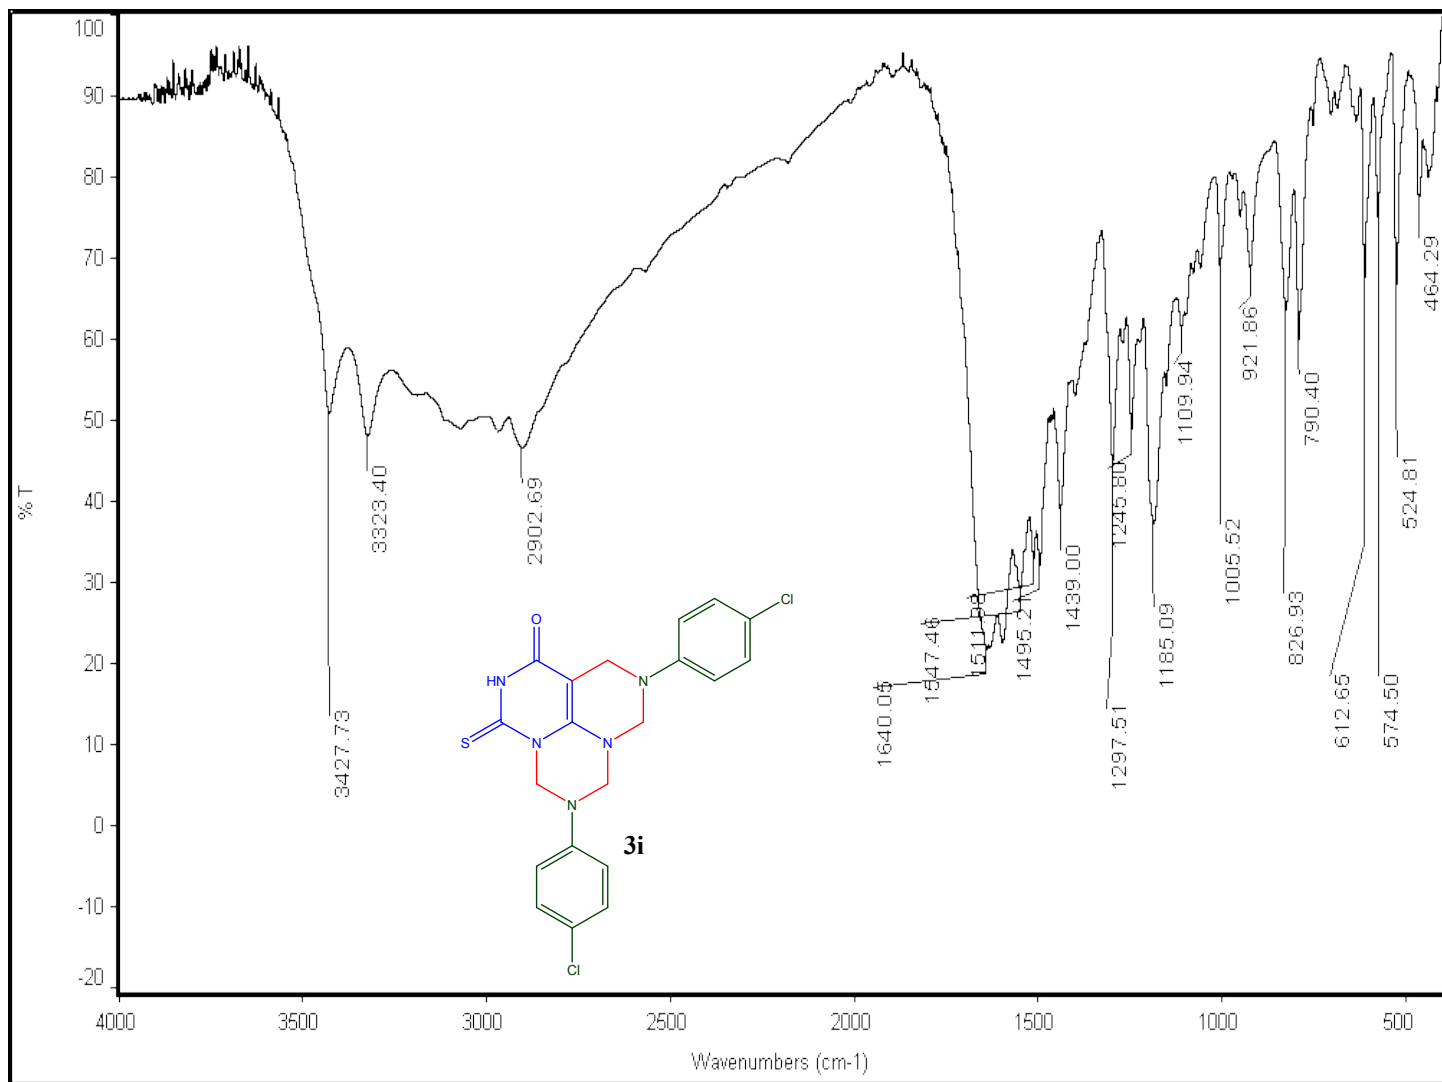

FTIR spectrum of compound **3i**

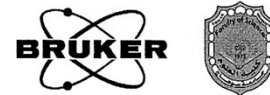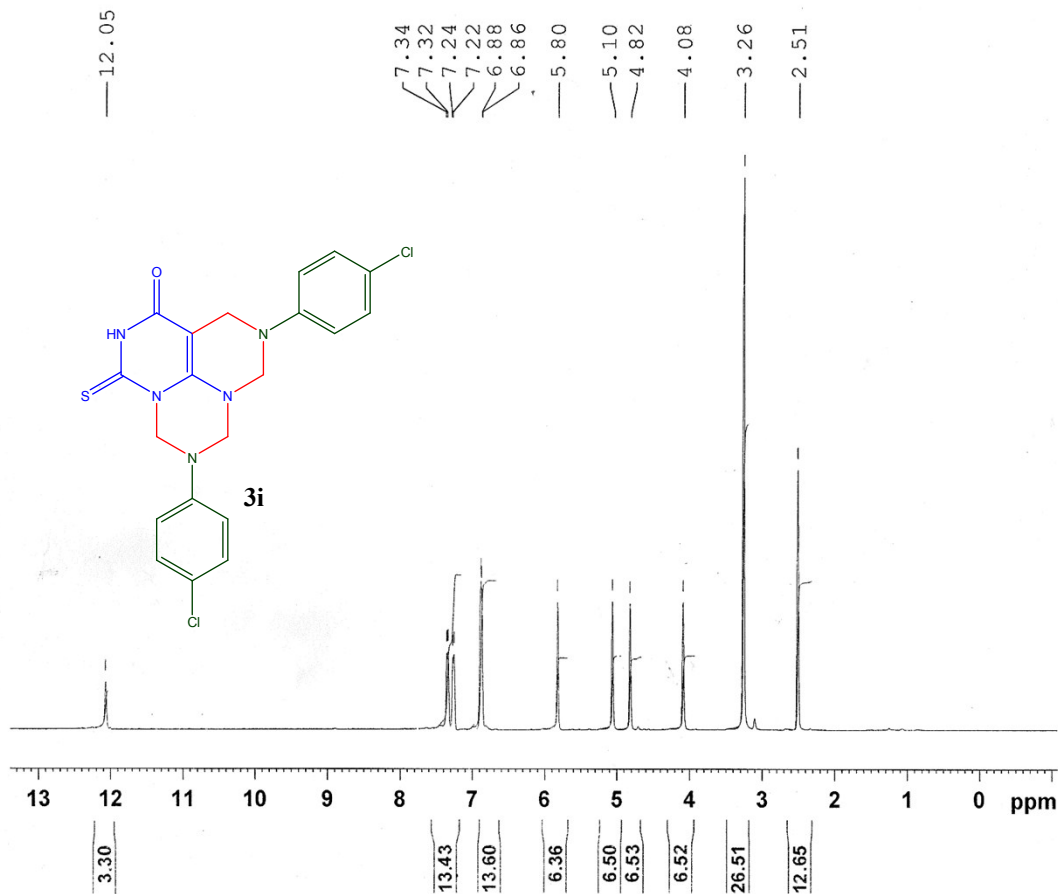

Current Data Parameters  
NAME Oct26-2015  
EXNO 160  
PROCNO 1

F2 - Acquisition Parameters  
Date 20151026  
Time 20.08  
INSTRUM spect  
PROBHD 5 mm PABBO BB/  
PULPROG zg30  
TD 65536  
SOLVENT DMSO  
NS 20  
DS 2  
SWH 8012.820 Hz  
FIDRES 0.122266 Hz  
AQ 4.0894465 sec  
RG 199.04  
DW 62.400 usec  
DE 6.50 usec  
TE 313.2 K  
D1 1.00000000 sec  
TDO 1

==== CHANNEL f1 =====  
SFO1 400.1324710 MHz  
NUC1 1H  
P1 12.00 usec  
PLW1 22.00000000 W

F2 - Processing parameters  
SI 65536  
SF 400.1300000 MHz  
WDW EM  
SSB 0  
LB 0.30 Hz  
GB 0  
PC 1.00

<sup>1</sup>H-NMR spectrum of compound **3i** (400 MHz, DMSO-*d*<sub>6</sub>).

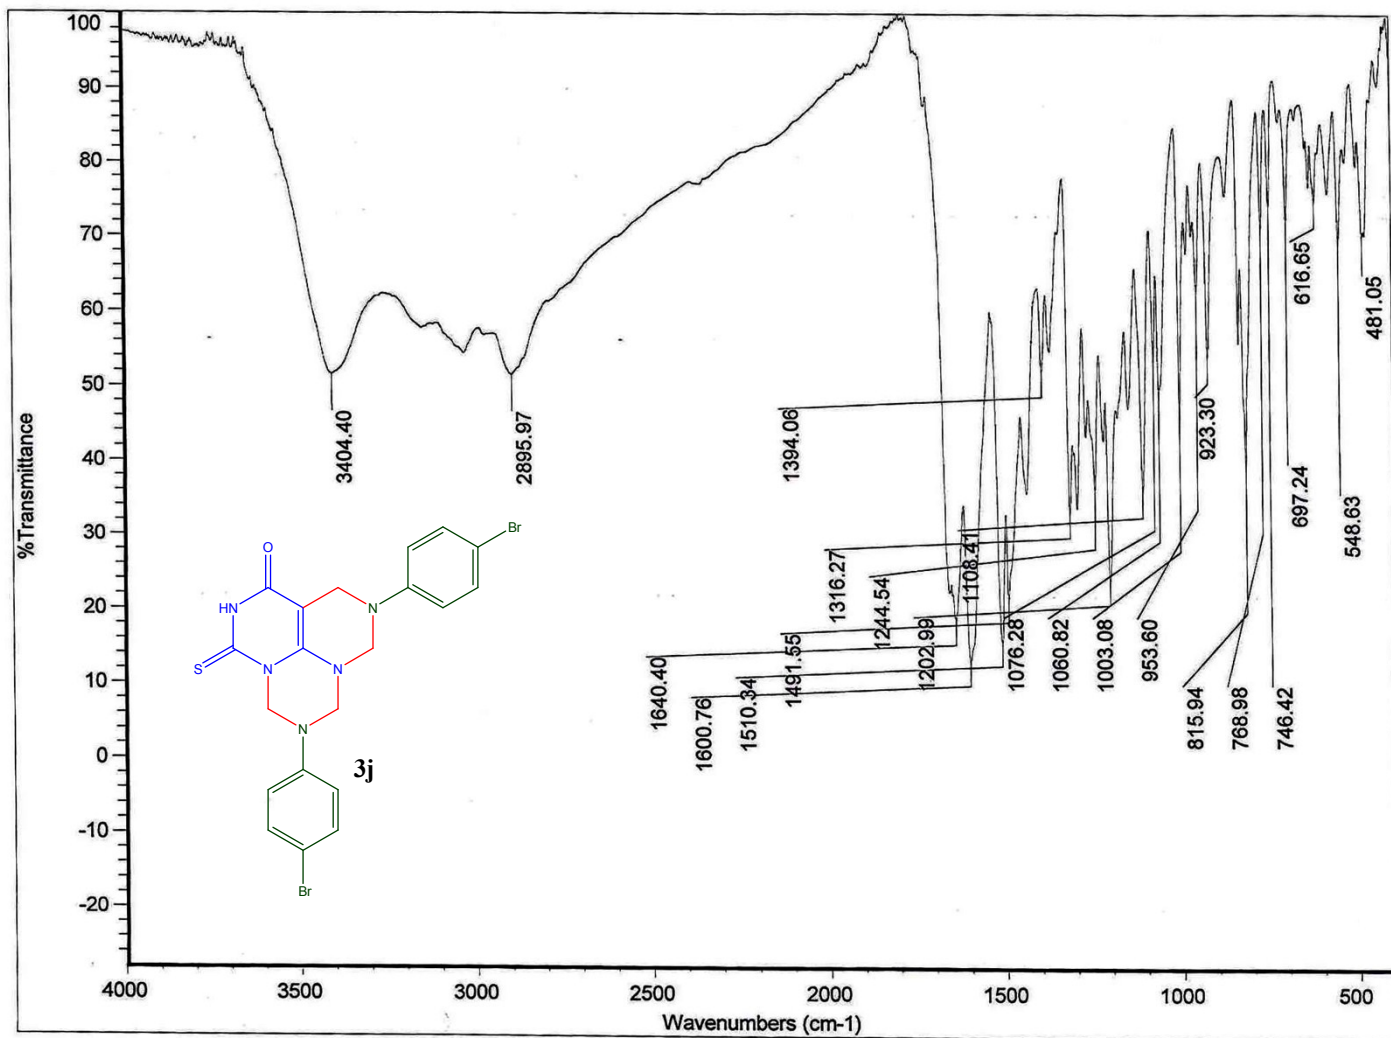

FTIR spectrum of compound **3j**

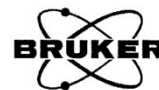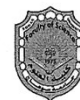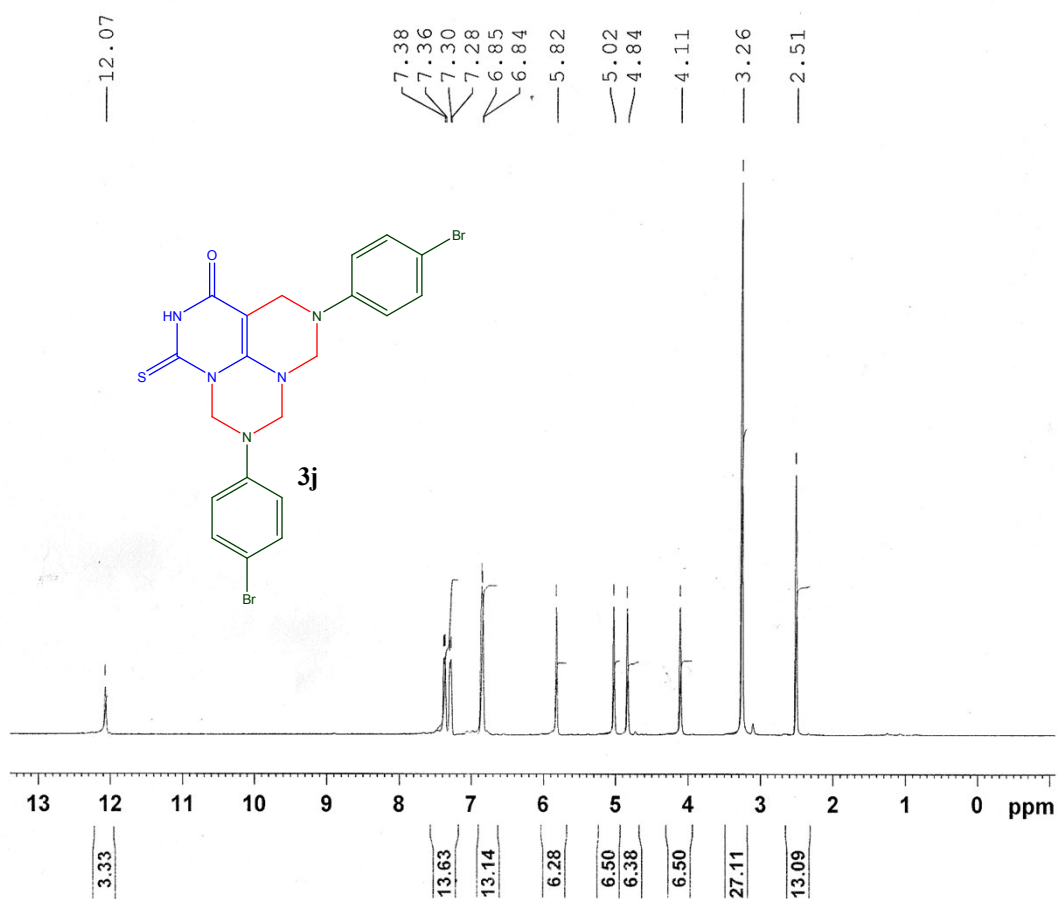

Current Data Parameters  
NAME Oct26-2015  
EXPNO 160  
PROCNO 1

F2 - Acquisition Parameters  
Date\_ 20151026  
Time 23.08  
INSTRUM spect  
PROBHD 5 mm PABBO BB/  
PULPROG zg30  
TD 65536  
SOLVENT DMSO  
NS 20  
DS 2  
SWH 8012.820 Hz  
FIDRES 0.122266 Hz  
AQ 4.0894465 sec  
RG 199.04  
DW 62.400 usec  
DE 6.50 usec  
TE 313.2 K  
D1 1.0000000 sec  
TDO 1

==== CHANNEL f1 =====  
SFO1 400.1324710 MHz  
NUC1 1H  
P1 12.00 usec  
PLW1 22.00000000 W

F2 - Processing parameters  
SI 65536  
SF 400.1300000 MHz  
WDW EM  
SSB 0  
LB 0.30 Hz  
GB 0  
PC 1.00

<sup>1</sup>H-NMR spectrum of compound **3j** (400 MHz, DMSO-*d*<sub>6</sub>).

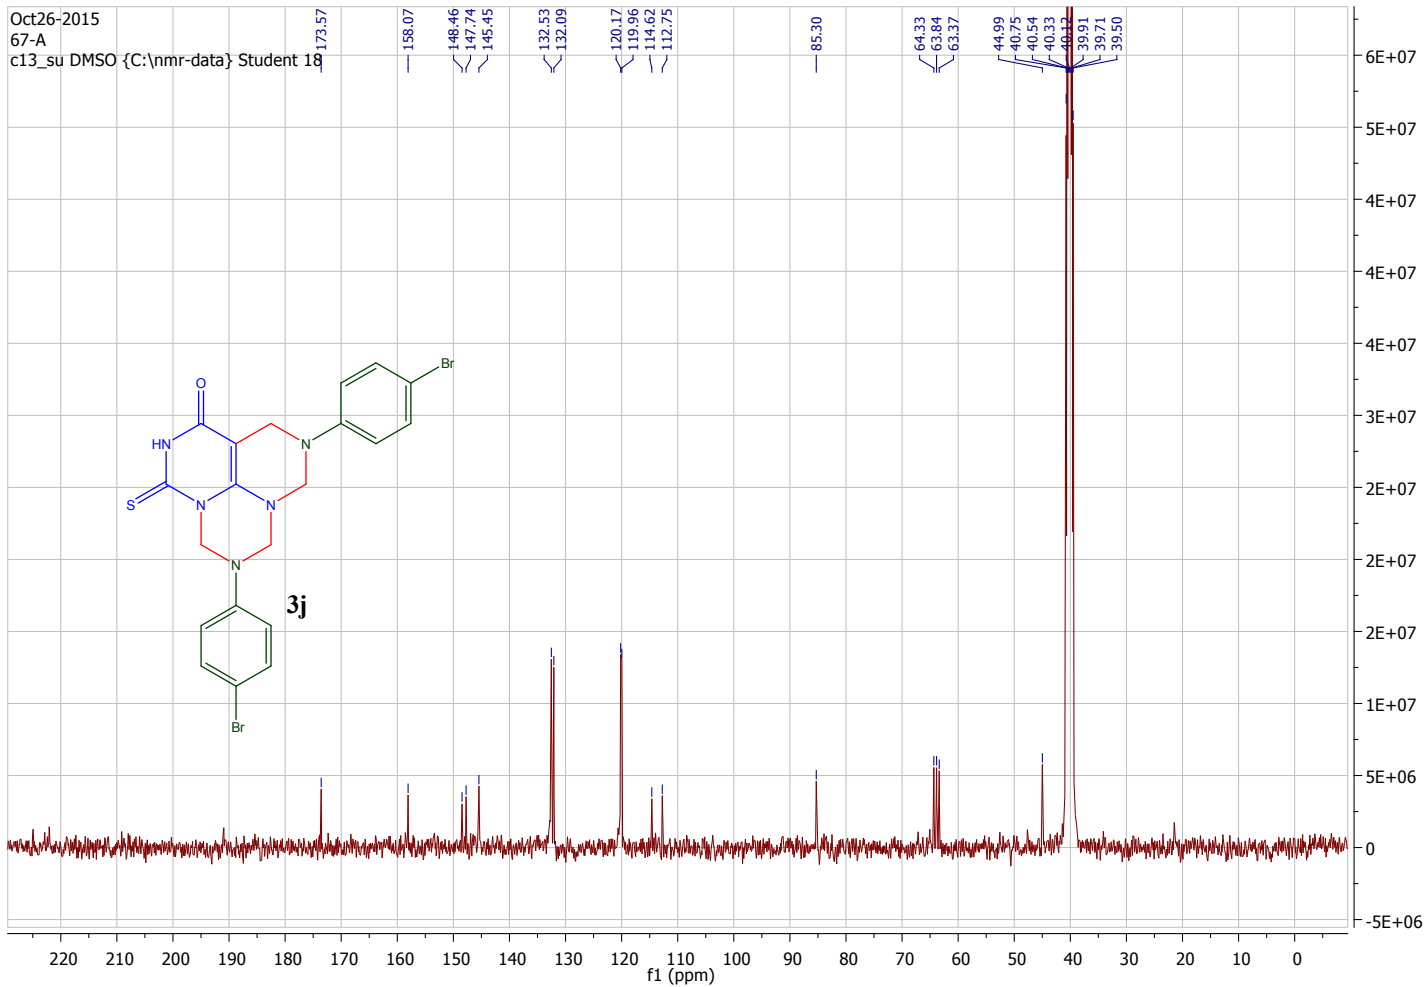

$^{13}\text{C}$ -NMR spectrum of compound **3j** (400 MHz,  $\text{DMSO-}d_6$ ).

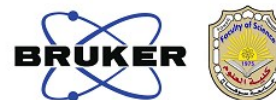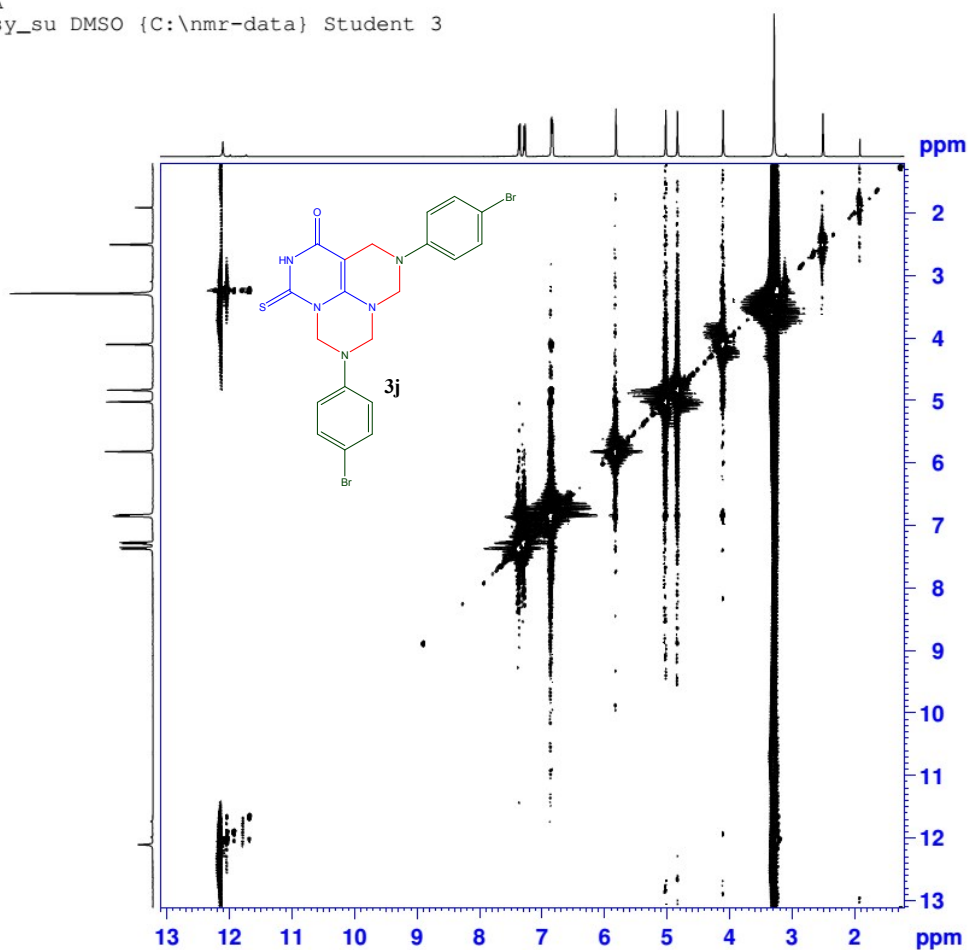

Current Data Parameters  
NAME Sep01-2016  
EXPNO 12  
PROCNO 1

F2 - Acquisition Parameters  
Date\_ 20160901  
Time 17.05  
INSTRUM spect  
PROBHD 5 mm PABBO BB/  
PULPROG roesyppp-2  
TD 2048  
SOLVENT DMSO  
NS 60  
DS 128  
SWH 4761.905 Hz  
FIDRES 2.325149 Hz  
AQ 0.2150400 sec  
RG 120.97  
DW 105.000 usec  
DE 6.50 usec  
TE 318.2 K  
DO 0.00009336 sec  
D11 0.99795198 sec  
D12 0.03000000 sec  
D1 0.00002000 sec  
IN0 0.00021000 sec  
L4 794  
P15 200000.00 usec

CHANNEL f1  
SF01 400.1328648 MHz  
NUC1 1H  
P1 12.00 usec  
P17 2500.00 usec  
P25 126.00 usec  
PLW1 22.00000000 W  
PLW10 4.68639994 W  
PLW27 0.79819000 W

F1 - Acquisition parameters  
TD 256  
SF01 400.1329 MHz  
FIDRES 18.601191 Hz  
SW 11.901 ppm  
FnMODE States-TPI1

F2 - Processing parameters  
SI 2048  
SF 400.1300000 MHz  
WDW QSINE  
SSB 2  
LB 0 Hz  
GB 0  
PC 1.00

F1 - Processing parameters  
SI 1024  
MC2 States-TPI1  
SF 400.1300000 MHz  
WDW QSINE  
SSB 2  
LB 0 Hz  
GB 0

ROESY-NMR spectrum of compound **3j** (400 MHz, DMSO-*d*<sub>6</sub>).

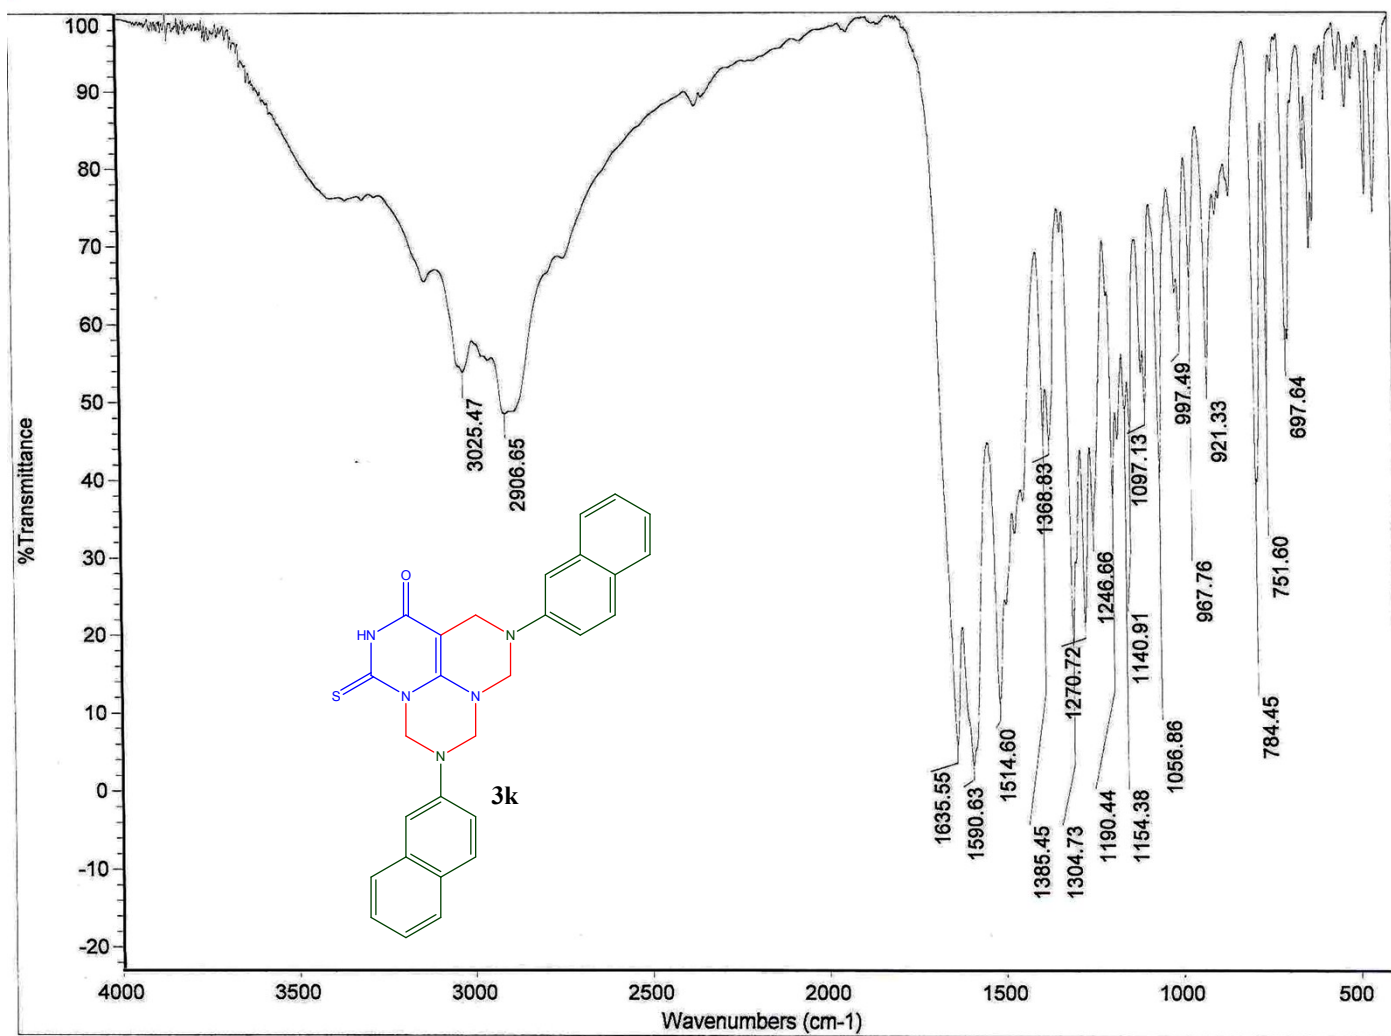

FTIR spectrum of compound 3k



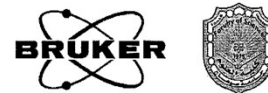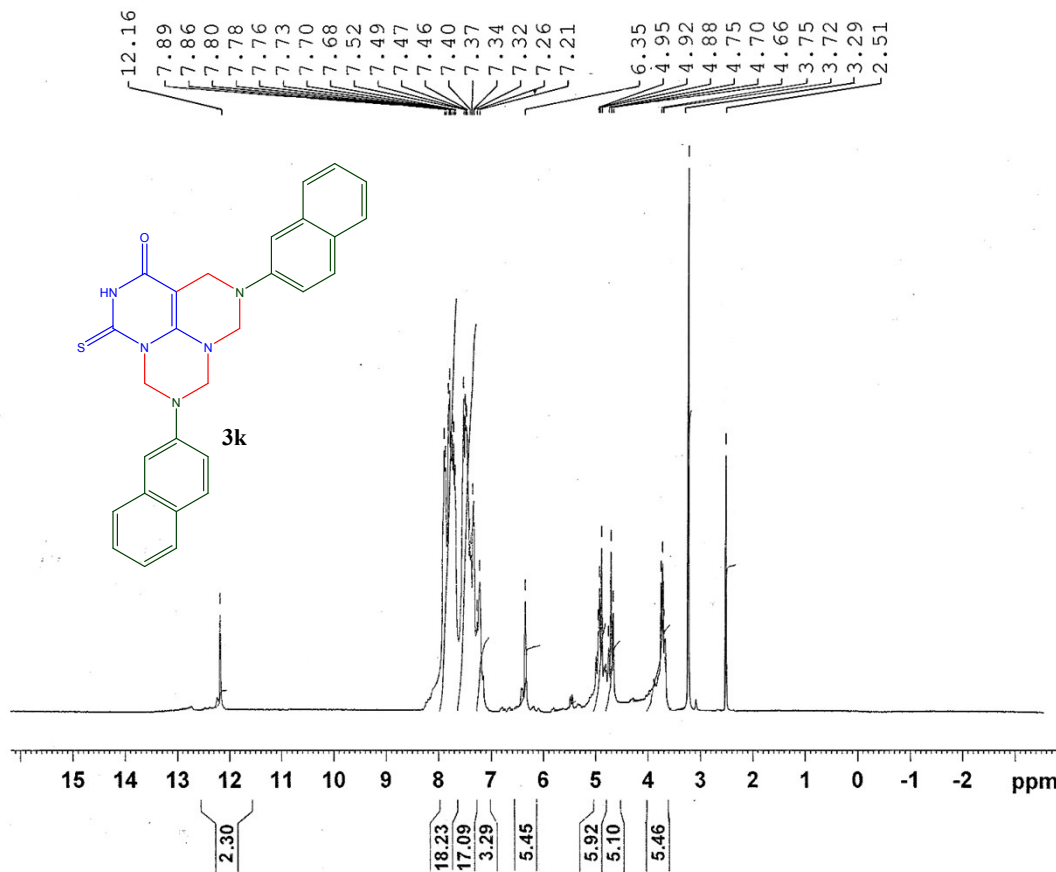

Current Data Parameters  
NAME Oct26-2015  
EXPNO 170  
PROCNO 1

F2 - Acquisition Parameters  
Date\_ 20151027  
Time 0.23  
INSTRUM spect  
PROBHD 5 mm PABBO BB/  
PULPROG zg30  
TD 65536  
SOLVENT DMSO  
NS 20  
DS 2  
SWH 8012.820 Hz  
FIDRES 0.122266 Hz  
AQ 4.0894465 sec  
RG 135  
DW 62.400 usec  
DE 6.50 usec  
TE 313.1 K  
D1 1.00000000 sec  
TDO 1

===== CHANNEL f1 =====  
SFO1 400.1324710 MHz  
NUC1 1H  
P1 12.00 usec  
PLW1 22.00000000 W

F2 - Processing parameters  
SI 65536  
SF 400.1300000 MHz  
WDW EM  
SSB 0  
LB 0.30 Hz  
GB 0  
PC 1.00

<sup>1</sup>H-NMR spectrum of compound **3k** (400 MHz, DMSO-*d*<sub>6</sub>).

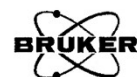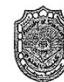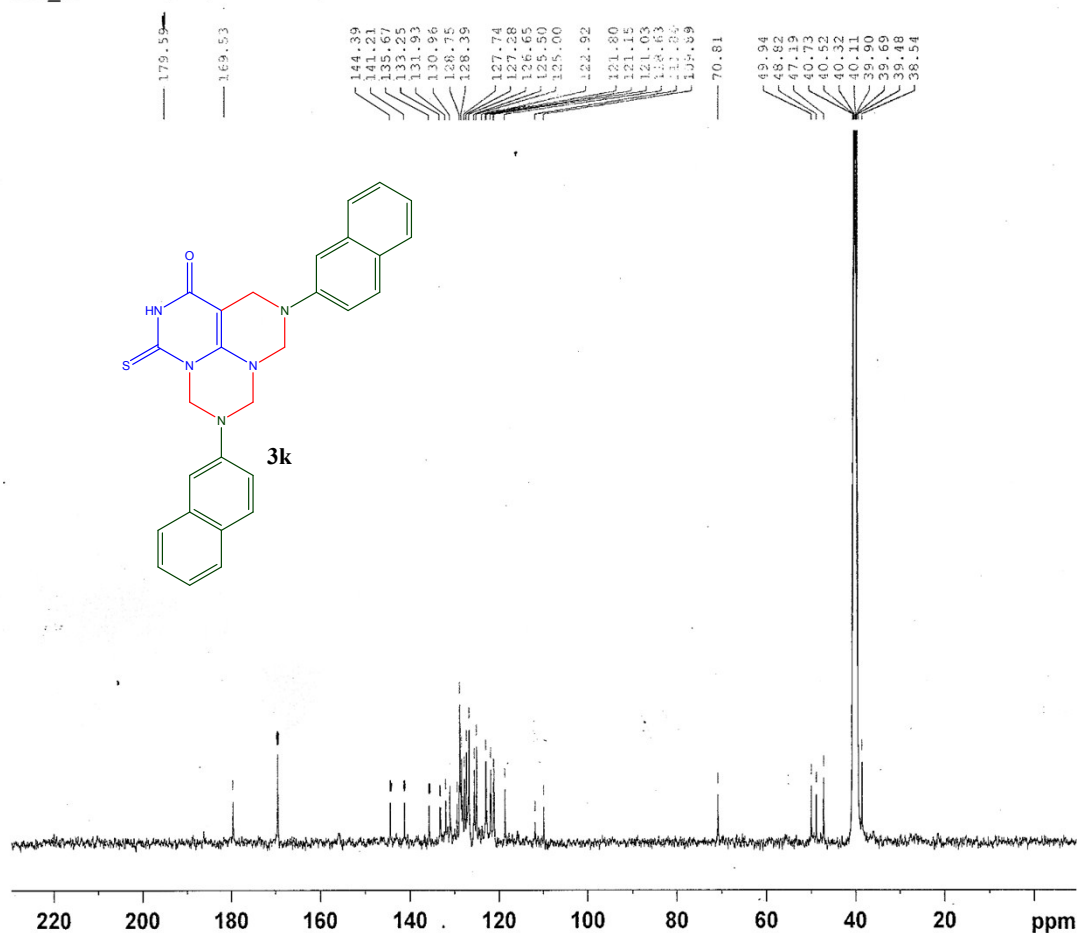

Current Data Parameters  
 NAME Oct26-2015  
 EXPNO 171  
 PROCNO 1

F2 - Acquisition Parameters  
 Date\_ 20151027  
 Time\_ 1.33  
 INSTRUM spect  
 PROBHD 5 mm PABBO BB/  
 PULPROG zgpg30  
 TD 65536  
 SOLVENT DMSO  
 NS 1200  
 DS 4  
 SWH 24038.461 Hz  
 FIDRES 0.366798 Hz  
 AQ 1.3631488 sec  
 RG 175.84  
 DW 20.800 usec  
 DE 6.50 usec  
 TE 313.2 K  
 D1 2.00000000 sec  
 D11 0.03000000 sec  
 TD0 1

===== CHANNEL f1 =====  
 SFO1 100.6238364 MHz  
 NUC1 13C  
 P1 9.50 usec  
 PLW1 56.00000000 W

===== CHANNEL f2 =====  
 SFO2 400.1316005 MHz  
 NUC2 1H  
 CPDPRG2 waltz16  
 PCPD2 90.00 usec  
 PLW2 22.00000000 W  
 PLW12 0.41091001 W  
 PLW13 0.33284000 W

F2 - Processing parameters  
 SI 32768  
 SF 100.6127690 MHz  
 WDW EM  
 SSB 0  
 LB 6.00 Hz  
 GB 0  
 PC 1.40

<sup>13</sup>C-NMR spectrum of compound **3k** (400 MHz, DMSO-*d*<sub>6</sub>).
